# Supplementary material for: Blood Component Therapy and Coagulopathy in Trauma: A Systematic Review of the Literature from the Trauma Update Group
Source: PubMed Central journal article supplement (PMC5047588; doi:10.1371/journal.pone.0164090), 2016-10-03

**S2-file:** MEDLINE database search, flow diagram illustrating the literature selection process, and evidence assessment for the first query and results from the PROPPR trial.

**Query # 2:** *“Does a fixed blood-plasma transfusion ratio reduce mortality in trauma?”*

**PubMed search details:** search date December 14 2014

```
((("blood transfusion"[MeSH Terms] OR ("blood"[All Fields] AND "transfusion"[All Fields]) OR "blood transfusion"[All Fields] OR "transfusion"[All Fields]) AND ("policy"[MeSH Terms] OR "policy"[All Fields])) OR (("blood transfusion"[MeSH Terms] OR ("blood"[All Fields] AND "transfusion"[All Fields]) OR "blood transfusion"[All Fields] OR "transfusion"[All Fields]) AND strategy[All Fields]) OR (("blood transfusion"[MeSH Terms] OR ("blood"[All Fields] AND "transfusion"[All Fields]) OR "blood transfusion"[All Fields] OR "transfusion"[All Fields]) AND ("Ratio (Oxf)"[Journal] OR "ratio"[All Fields])) OR (massive[All Fields] AND ("blood transfusion"[MeSH Terms] OR ("blood"[All Fields] AND "transfusion"[All Fields]) OR "blood transfusion"[All Fields] OR "transfusion"[All Fields]))) AND (("injuries"[Subheading] OR "injuries"[All Fields] OR "trauma"[All Fields] OR "wounds and injuries"[MeSH Terms] OR ("wounds"[All Fields] AND "injuries"[All Fields]) OR "wounds and injuries"[All Fields]) OR (traumatic[All Fields] AND ("haemorrhage"[All Fields] OR "hemorrhage"[MeSH Terms] OR "hemorrhage"[All Fields])) OR ("shock, traumatic"[MeSH Terms] OR ("shock"[All Fields] AND "traumatic"[All Fields]) OR "traumatic shock"[All Fields] OR ("traumatic"[All Fields] AND "shock"[All Fields]))) AND ("2000"[PDAT] : "3000"[PDAT])
```

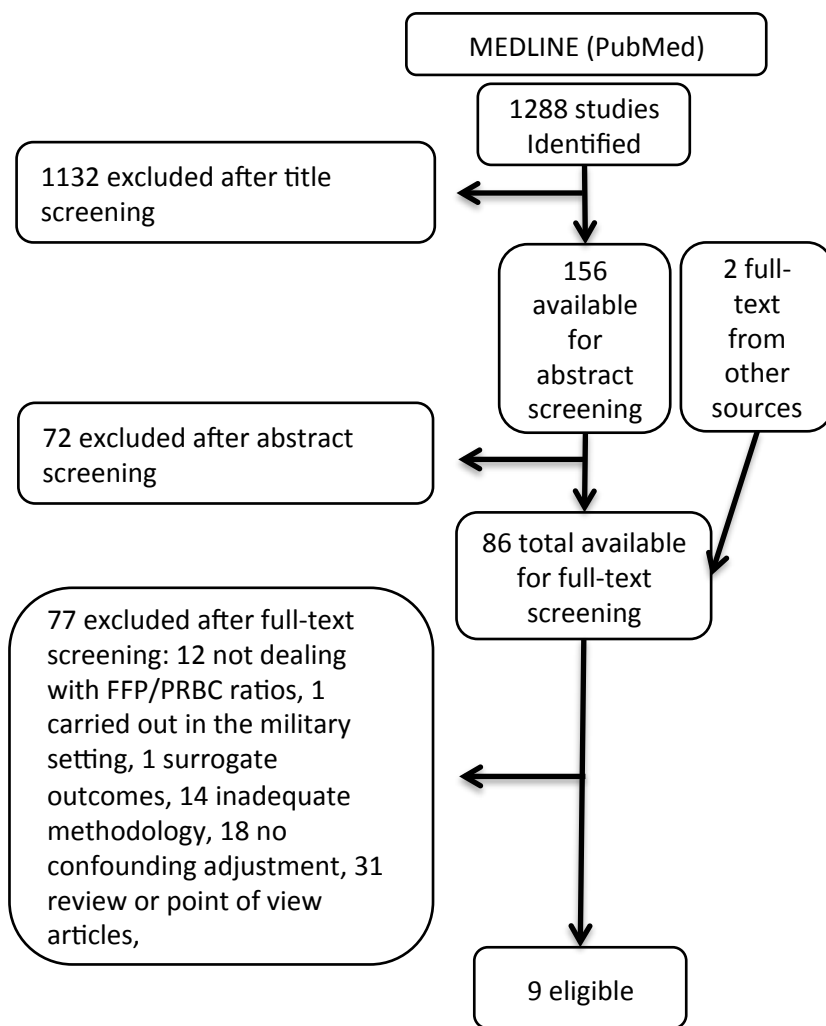

**Table S2**

|                               |                                                                                                                                                                                                                                                                                                                                                                                                                                                                                                                                                                                                                                                                                                                                                                                                                                                                                                                                                                                                                                                                                                       |                                                                                                                                                        |
|-------------------------------|-------------------------------------------------------------------------------------------------------------------------------------------------------------------------------------------------------------------------------------------------------------------------------------------------------------------------------------------------------------------------------------------------------------------------------------------------------------------------------------------------------------------------------------------------------------------------------------------------------------------------------------------------------------------------------------------------------------------------------------------------------------------------------------------------------------------------------------------------------------------------------------------------------------------------------------------------------------------------------------------------------------------------------------------------------------------------------------------------------|--------------------------------------------------------------------------------------------------------------------------------------------------------|
| Observational study           | 1                                                                                                                                                                                                                                                                                                                                                                                                                                                                                                                                                                                                                                                                                                                                                                                                                                                                                                                                                                                                                                                                                                     |                                                                                                                                                        |
| Year                          | 2008                                                                                                                                                                                                                                                                                                                                                                                                                                                                                                                                                                                                                                                                                                                                                                                                                                                                                                                                                                                                                                                                                                  |                                                                                                                                                        |
| Journal                       | AS                                                                                                                                                                                                                                                                                                                                                                                                                                                                                                                                                                                                                                                                                                                                                                                                                                                                                                                                                                                                                                                                                                    |                                                                                                                                                        |
| First Author                  | Scalea                                                                                                                                                                                                                                                                                                                                                                                                                                                                                                                                                                                                                                                                                                                                                                                                                                                                                                                                                                                                                                                                                                |                                                                                                                                                        |
| Statistical method            | Logistic regression                                                                                                                                                                                                                                                                                                                                                                                                                                                                                                                                                                                                                                                                                                                                                                                                                                                                                                                                                                                                                                                                                   |                                                                                                                                                        |
| Inclusion criteria            | Patients admitted to the ICU for trauma occurred within 24 hours                                                                                                                                                                                                                                                                                                                                                                                                                                                                                                                                                                                                                                                                                                                                                                                                                                                                                                                                                                                                                                      |                                                                                                                                                        |
| Treatment                     | PRBC:FFP ratio as a continuous variable or 1:1                                                                                                                                                                                                                                                                                                                                                                                                                                                                                                                                                                                                                                                                                                                                                                                                                                                                                                                                                                                                                                                        |                                                                                                                                                        |
| Centres                       | 1                                                                                                                                                                                                                                                                                                                                                                                                                                                                                                                                                                                                                                                                                                                                                                                                                                                                                                                                                                                                                                                                                                     | <b>Outcome</b><br>NA<br><b>Variable: OR (95%-CI)</b><br>PRBC:FFP ratio 1:1: 0.57 (0.19-1.66)<br>PRBC:FFP ratio (continuous variable): 1.23 (0.81-1.87) |
| N° patients/centre/year       | NA                                                                                                                                                                                                                                                                                                                                                                                                                                                                                                                                                                                                                                                                                                                                                                                                                                                                                                                                                                                                                                                                                                    |                                                                                                                                                        |
| Study duration (days)         | 882                                                                                                                                                                                                                                                                                                                                                                                                                                                                                                                                                                                                                                                                                                                                                                                                                                                                                                                                                                                                                                                                                                   |                                                                                                                                                        |
| Total (included in the model) | NA                                                                                                                                                                                                                                                                                                                                                                                                                                                                                                                                                                                                                                                                                                                                                                                                                                                                                                                                                                                                                                                                                                    |                                                                                                                                                        |
| <b>GRADE CRITERIA</b>         |                                                                                                                                                                                                                                                                                                                                                                                                                                                                                                                                                                                                                                                                                                                                                                                                                                                                                                                                                                                                                                                                                                       |                                                                                                                                                        |
|                               | <b>Statistical reporting</b>                                                                                                                                                                                                                                                                                                                                                                                                                                                                                                                                                                                                                                                                                                                                                                                                                                                                                                                                                                                                                                                                          | Partial                                                                                                                                                |
|                               | <b>Statistical quality</b>                                                                                                                                                                                                                                                                                                                                                                                                                                                                                                                                                                                                                                                                                                                                                                                                                                                                                                                                                                                                                                                                            | Low                                                                                                                                                    |
| <b>Downgrading</b>            | Appropriate eligibility criteria                                                                                                                                                                                                                                                                                                                                                                                                                                                                                                                                                                                                                                                                                                                                                                                                                                                                                                                                                                                                                                                                      | Yes                                                                                                                                                    |
|                               | Measurement of exposure                                                                                                                                                                                                                                                                                                                                                                                                                                                                                                                                                                                                                                                                                                                                                                                                                                                                                                                                                                                                                                                                               | Yes                                                                                                                                                    |
|                               | Measurement of outcome                                                                                                                                                                                                                                                                                                                                                                                                                                                                                                                                                                                                                                                                                                                                                                                                                                                                                                                                                                                                                                                                                | Yes                                                                                                                                                    |
|                               | Adequate control for confounding                                                                                                                                                                                                                                                                                                                                                                                                                                                                                                                                                                                                                                                                                                                                                                                                                                                                                                                                                                                                                                                                      | No                                                                                                                                                     |
|                               | Bias                                                                                                                                                                                                                                                                                                                                                                                                                                                                                                                                                                                                                                                                                                                                                                                                                                                                                                                                                                                                                                                                                                  | very serious                                                                                                                                           |
| <b>GRADE overall</b>          |                                                                                                                                                                                                                                                                                                                                                                                                                                                                                                                                                                                                                                                                                                                                                                                                                                                                                                                                                                                                                                                                                                       |                                                                                                                                                        |
| <b>Up-grading</b>             | Size of effect                                                                                                                                                                                                                                                                                                                                                                                                                                                                                                                                                                                                                                                                                                                                                                                                                                                                                                                                                                                                                                                                                        | Not relevant                                                                                                                                           |
|                               | Residual confounding                                                                                                                                                                                                                                                                                                                                                                                                                                                                                                                                                                                                                                                                                                                                                                                                                                                                                                                                                                                                                                                                                  | Does not indicate upgrading                                                                                                                            |
|                               | Dose /response                                                                                                                                                                                                                                                                                                                                                                                                                                                                                                                                                                                                                                                                                                                                                                                                                                                                                                                                                                                                                                                                                        | Yes                                                                                                                                                    |
| <b>DETAILS</b>                |                                                                                                                                                                                                                                                                                                                                                                                                                                                                                                                                                                                                                                                                                                                                                                                                                                                                                                                                                                                                                                                                                                       |                                                                                                                                                        |
| <b>Downgrading</b>            | <p>Adequate control for confounding: Important predictors were not included in the mortality model. Statistical reporting : Logistic regression. No Statistical support reported. Checking for conformity with linear gradient for continuous variables not reported. Test for interaction not reported. Goodness-of-fit assessment not reported. Collinearity assessment not reported. Statistical tests for models not reported. Reporting of variable coding method not indicated. Comments: 365 patients received PRBC, and of these 250 also FFP (thus, entering the logistic regression models). Statistical quality: Bivariate analysis for variable selection is an inappropriate method, especially when dealing with small samples. Automatic procedures such as the stepwise procedure used in the study are also not the best choice. The model was overfitted since it included 8 variables (not more than 51 deaths occurred). The ICU length of stay was included in the model introducing a bias. The study did not account for survival bias. No propensity score was developed.</p> |                                                                                                                                                        |
| <b>Up-grading</b>             |                                                                                                                                                                                                                                                                                                                                                                                                                                                                                                                                                                                                                                                                                                                                                                                                                                                                                                                                                                                                                                                                                                       |                                                                                                                                                        |
| <b>External validity</b>      | Single center study. Number of patients used for logistic regression not clearly reported                                                                                                                                                                                                                                                                                                                                                                                                                                                                                                                                                                                                                                                                                                                                                                                                                                                                                                                                                                                                             |                                                                                                                                                        |
| <b>Conclusive evaluation</b>  | GRADE rating up/down                                                                                                                                                                                                                                                                                                                                                                                                                                                                                                                                                                                                                                                                                                                                                                                                                                                                                                                                                                                                                                                                                  | Downgraded study                                                                                                                                       |
|                               | GRADE rating                                                                                                                                                                                                                                                                                                                                                                                                                                                                                                                                                                                                                                                                                                                                                                                                                                                                                                                                                                                                                                                                                          | Very low evidence                                                                                                                                      |
|                               | Statistical reporting                                                                                                                                                                                                                                                                                                                                                                                                                                                                                                                                                                                                                                                                                                                                                                                                                                                                                                                                                                                                                                                                                 | Partial                                                                                                                                                |
|                               | Statistical quality                                                                                                                                                                                                                                                                                                                                                                                                                                                                                                                                                                                                                                                                                                                                                                                                                                                                                                                                                                                                                                                                                   | Low                                                                                                                                                    |
|                               | External validity issues                                                                                                                                                                                                                                                                                                                                                                                                                                                                                                                                                                                                                                                                                                                                                                                                                                                                                                                                                                                                                                                                              | Yes                                                                                                                                                    |
|                               | Final grading                                                                                                                                                                                                                                                                                                                                                                                                                                                                                                                                                                                                                                                                                                                                                                                                                                                                                                                                                                                                                                                                                         | Downgraded study                                                                                                                                       |
|                               | Final level of evidence                                                                                                                                                                                                                                                                                                                                                                                                                                                                                                                                                                                                                                                                                                                                                                                                                                                                                                                                                                                                                                                                               | Very low evidence                                                                                                                                      |

**Table S2** (continued from the previous page)

|                               |                                                                                                                                                                                                                                                                                                                                                                                                                                                                                                                                                                                                                                  |                                                                                                          |
|-------------------------------|----------------------------------------------------------------------------------------------------------------------------------------------------------------------------------------------------------------------------------------------------------------------------------------------------------------------------------------------------------------------------------------------------------------------------------------------------------------------------------------------------------------------------------------------------------------------------------------------------------------------------------|----------------------------------------------------------------------------------------------------------|
| Observational study           | 2                                                                                                                                                                                                                                                                                                                                                                                                                                                                                                                                                                                                                                |                                                                                                          |
| Year                          | 2010                                                                                                                                                                                                                                                                                                                                                                                                                                                                                                                                                                                                                             |                                                                                                          |
| Journal                       | JACS                                                                                                                                                                                                                                                                                                                                                                                                                                                                                                                                                                                                                             |                                                                                                          |
| First Author                  | Inaba                                                                                                                                                                                                                                                                                                                                                                                                                                                                                                                                                                                                                            |                                                                                                          |
| Statistical method            | Propensity score matching                                                                                                                                                                                                                                                                                                                                                                                                                                                                                                                                                                                                        |                                                                                                          |
| Inclusion criteria            | Trauma admitted to surgical ICU receiving < 10 PRBC units within 12 hours from admssion (excluding deaths occured within 24 hours)                                                                                                                                                                                                                                                                                                                                                                                                                                                                                               |                                                                                                          |
| Treatment                     | Receiving FFP                                                                                                                                                                                                                                                                                                                                                                                                                                                                                                                                                                                                                    |                                                                                                          |
| Centres                       | 1                                                                                                                                                                                                                                                                                                                                                                                                                                                                                                                                                                                                                                | <b>Outcome</b><br>Hospital mortality: 89 (15.7%)<br><b>Variable: OR (95%-CI)</b><br>FFP: 1.27 (0.81-2.0) |
| N° patients/centre/year       | 95                                                                                                                                                                                                                                                                                                                                                                                                                                                                                                                                                                                                                               |                                                                                                          |
| Study duration (days)         | 2191                                                                                                                                                                                                                                                                                                                                                                                                                                                                                                                                                                                                                             |                                                                                                          |
| Total (included in the model) | 568                                                                                                                                                                                                                                                                                                                                                                                                                                                                                                                                                                                                                              |                                                                                                          |
| Hospital mortality            | 89 (15.7%)                                                                                                                                                                                                                                                                                                                                                                                                                                                                                                                                                                                                                       |                                                                                                          |
| <b>GRADE CRITERIA</b>         |                                                                                                                                                                                                                                                                                                                                                                                                                                                                                                                                                                                                                                  |                                                                                                          |
|                               | <b>Statistical reporting</b>                                                                                                                                                                                                                                                                                                                                                                                                                                                                                                                                                                                                     | Partial                                                                                                  |
|                               | <b>Statistical quality</b>                                                                                                                                                                                                                                                                                                                                                                                                                                                                                                                                                                                                       | Low                                                                                                      |
| <b>Downgrading</b>            | Appropriate eligibility criteria                                                                                                                                                                                                                                                                                                                                                                                                                                                                                                                                                                                                 | Yes                                                                                                      |
|                               | Measurement of exposure                                                                                                                                                                                                                                                                                                                                                                                                                                                                                                                                                                                                          | Yes                                                                                                      |
|                               | Measurement of outcome                                                                                                                                                                                                                                                                                                                                                                                                                                                                                                                                                                                                           | Yes                                                                                                      |
|                               | Adequate control for confounding                                                                                                                                                                                                                                                                                                                                                                                                                                                                                                                                                                                                 | No                                                                                                       |
|                               | Bias                                                                                                                                                                                                                                                                                                                                                                                                                                                                                                                                                                                                                             | very serious                                                                                             |
|                               | GRADE overall                                                                                                                                                                                                                                                                                                                                                                                                                                                                                                                                                                                                                    |                                                                                                          |
| <b>Up-grading</b>             | Size of effect                                                                                                                                                                                                                                                                                                                                                                                                                                                                                                                                                                                                                   | Not relevant                                                                                             |
|                               | Residual confounding                                                                                                                                                                                                                                                                                                                                                                                                                                                                                                                                                                                                             | Does not indicate upgrading                                                                              |
|                               | Dose /response                                                                                                                                                                                                                                                                                                                                                                                                                                                                                                                                                                                                                   | Not applicable                                                                                           |
| <b>DETAILS</b>                |                                                                                                                                                                                                                                                                                                                                                                                                                                                                                                                                                                                                                                  |                                                                                                          |
| <b>Downgrading</b>            | Adequate control for confounding: Important predictors were not included in the propensity score. Cut-offs for variable dichotomization were arbitrarily defined. Statistical reporting: The propensity score development process was not reported and was not available for quality assessment. Statistical quality: Insufficient statistical reporting. All continuous variables were dichotomized according to arbitrary cut-offs. Although the study was well designed from a statistical point of view, the lack of reporting of the propensity score limits its evaluability. The study did not account for survival bias. |                                                                                                          |
| <b>Up-grading</b>             |                                                                                                                                                                                                                                                                                                                                                                                                                                                                                                                                                                                                                                  |                                                                                                          |
| <b>External validity</b>      | Single center study                                                                                                                                                                                                                                                                                                                                                                                                                                                                                                                                                                                                              |                                                                                                          |
| <b>Conclusive evaluation</b>  | GRADE rating up/down                                                                                                                                                                                                                                                                                                                                                                                                                                                                                                                                                                                                             | Downgraded study                                                                                         |
|                               | GRADE rating                                                                                                                                                                                                                                                                                                                                                                                                                                                                                                                                                                                                                     | Very low evidence                                                                                        |
|                               | Statistical reporting                                                                                                                                                                                                                                                                                                                                                                                                                                                                                                                                                                                                            | Partial                                                                                                  |
|                               | Statistical quality                                                                                                                                                                                                                                                                                                                                                                                                                                                                                                                                                                                                              | Low                                                                                                      |
|                               | External validity issues                                                                                                                                                                                                                                                                                                                                                                                                                                                                                                                                                                                                         | Yes                                                                                                      |
|                               | Final grading                                                                                                                                                                                                                                                                                                                                                                                                                                                                                                                                                                                                                    | Downgraded study                                                                                         |
| Final level of evidence       | Very low evidence                                                                                                                                                                                                                                                                                                                                                                                                                                                                                                                                                                                                                |                                                                                                          |

**Table S2** (continued from the previous page)

|                               |                                                                                                                                                                                                                                                                                                                                                                                                                                                                                                                                                                                                                                                                                                                                                                                                                                                                                                                                                        |                                                                                                                                                                                                    |
|-------------------------------|--------------------------------------------------------------------------------------------------------------------------------------------------------------------------------------------------------------------------------------------------------------------------------------------------------------------------------------------------------------------------------------------------------------------------------------------------------------------------------------------------------------------------------------------------------------------------------------------------------------------------------------------------------------------------------------------------------------------------------------------------------------------------------------------------------------------------------------------------------------------------------------------------------------------------------------------------------|----------------------------------------------------------------------------------------------------------------------------------------------------------------------------------------------------|
| Observational                 | 3                                                                                                                                                                                                                                                                                                                                                                                                                                                                                                                                                                                                                                                                                                                                                                                                                                                                                                                                                      |                                                                                                                                                                                                    |
| Year                          | 2011                                                                                                                                                                                                                                                                                                                                                                                                                                                                                                                                                                                                                                                                                                                                                                                                                                                                                                                                                   |                                                                                                                                                                                                    |
| Journal                       | JT                                                                                                                                                                                                                                                                                                                                                                                                                                                                                                                                                                                                                                                                                                                                                                                                                                                                                                                                                     |                                                                                                                                                                                                    |
| First Author                  | Wafaisade                                                                                                                                                                                                                                                                                                                                                                                                                                                                                                                                                                                                                                                                                                                                                                                                                                                                                                                                              |                                                                                                                                                                                                    |
| Statistical method            | Logistic regression                                                                                                                                                                                                                                                                                                                                                                                                                                                                                                                                                                                                                                                                                                                                                                                                                                                                                                                                    |                                                                                                                                                                                                    |
| Inclusion criteria            | Patients receiving more than 3 and less than 10 PRBC units from arrival to the ER and admission to the ICU (excluding those dying within one hour from hospital admission)                                                                                                                                                                                                                                                                                                                                                                                                                                                                                                                                                                                                                                                                                                                                                                             |                                                                                                                                                                                                    |
| Treatment                     | FFP:PRBC ratio > 1:1                                                                                                                                                                                                                                                                                                                                                                                                                                                                                                                                                                                                                                                                                                                                                                                                                                                                                                                                   |                                                                                                                                                                                                    |
| Centres                       | 116                                                                                                                                                                                                                                                                                                                                                                                                                                                                                                                                                                                                                                                                                                                                                                                                                                                                                                                                                    | <b>Outcome</b><br>Hospital mortality: 321 (23.6%)<br><b>Variable: OR (95%-CI)</b><br>FFP:PRBC ratio <1:1: Ref = 1<br>FFP:PRBC ratio =1:1: 0.8 (0.54-1.18)<br>FFP:PRBC ratio >1:1: 0.52 (0.31-0.87) |
| N° patients/centre/year       | 3                                                                                                                                                                                                                                                                                                                                                                                                                                                                                                                                                                                                                                                                                                                                                                                                                                                                                                                                                      |                                                                                                                                                                                                    |
| Study duration (days)         | 1460                                                                                                                                                                                                                                                                                                                                                                                                                                                                                                                                                                                                                                                                                                                                                                                                                                                                                                                                                   |                                                                                                                                                                                                    |
| Total (included in the model) | 1362                                                                                                                                                                                                                                                                                                                                                                                                                                                                                                                                                                                                                                                                                                                                                                                                                                                                                                                                                   |                                                                                                                                                                                                    |
| <b>GRADE CRITERIA</b>         |                                                                                                                                                                                                                                                                                                                                                                                                                                                                                                                                                                                                                                                                                                                                                                                                                                                                                                                                                        |                                                                                                                                                                                                    |
|                               | <b>Statistical reporting</b>                                                                                                                                                                                                                                                                                                                                                                                                                                                                                                                                                                                                                                                                                                                                                                                                                                                                                                                           | Partial                                                                                                                                                                                            |
|                               | <b>Statistical quality</b>                                                                                                                                                                                                                                                                                                                                                                                                                                                                                                                                                                                                                                                                                                                                                                                                                                                                                                                             | Low                                                                                                                                                                                                |
| <b>Downgrading</b>            | Appropriate eligibility criteria                                                                                                                                                                                                                                                                                                                                                                                                                                                                                                                                                                                                                                                                                                                                                                                                                                                                                                                       | 0                                                                                                                                                                                                  |
|                               | Measurement of exposure                                                                                                                                                                                                                                                                                                                                                                                                                                                                                                                                                                                                                                                                                                                                                                                                                                                                                                                                | No                                                                                                                                                                                                 |
|                               | Measurement of outcome                                                                                                                                                                                                                                                                                                                                                                                                                                                                                                                                                                                                                                                                                                                                                                                                                                                                                                                                 | No                                                                                                                                                                                                 |
|                               | Adequate control for confounding                                                                                                                                                                                                                                                                                                                                                                                                                                                                                                                                                                                                                                                                                                                                                                                                                                                                                                                       | No                                                                                                                                                                                                 |
|                               | Bias                                                                                                                                                                                                                                                                                                                                                                                                                                                                                                                                                                                                                                                                                                                                                                                                                                                                                                                                                   | Not assessable                                                                                                                                                                                     |
|                               | GRADE overall                                                                                                                                                                                                                                                                                                                                                                                                                                                                                                                                                                                                                                                                                                                                                                                                                                                                                                                                          | Not assessable                                                                                                                                                                                     |
| <b>Up-grading</b>             | Size of effect                                                                                                                                                                                                                                                                                                                                                                                                                                                                                                                                                                                                                                                                                                                                                                                                                                                                                                                                         | Not relevant                                                                                                                                                                                       |
|                               | Residual confounding                                                                                                                                                                                                                                                                                                                                                                                                                                                                                                                                                                                                                                                                                                                                                                                                                                                                                                                                   | Does not indicate upgrading                                                                                                                                                                        |
|                               | Dose /response                                                                                                                                                                                                                                                                                                                                                                                                                                                                                                                                                                                                                                                                                                                                                                                                                                                                                                                                         | Yes                                                                                                                                                                                                |
| <b>DETAILS</b>                |                                                                                                                                                                                                                                                                                                                                                                                                                                                                                                                                                                                                                                                                                                                                                                                                                                                                                                                                                        |                                                                                                                                                                                                    |
| <b>Downgrading</b>            | Adequate control for confounding: Only 3 variables remained in the model an insufficient number for explanatory purposes. Statistical reporting: Logistic regression. No Statistical support reported. Checking for conformity with linear gradient for continuous variables not reported. Test for interaction not reported. Goodness-of-fit assessment not reported. Collinearity assessment not reported. Statistical tests for models not reported. Variable selection method: Stepwise forward selection. Reporting of variable coding method not performed.. Statistical quality: Insufficient statistical reporting. Bivariate analysis was performed to select variables to enter the stepwise forward selection process, using a low p value cut-off (0.05). Total-body CT scan surprisingly turned out to be protective, the study did not account for survival bias. No propensity score was developed though a treatment was investigated. |                                                                                                                                                                                                    |
| <b>Up-grading</b>             | Dose /response: Progressive Odds Ratios reduction with increasing PRBC:FFP ratios generated , however, by a potentially biased model. Upgrading not indicated.                                                                                                                                                                                                                                                                                                                                                                                                                                                                                                                                                                                                                                                                                                                                                                                         |                                                                                                                                                                                                    |
| <b>External validity</b>      | Only 3 patients/centre/year were recruited on average questioning the representativeness of the sample.                                                                                                                                                                                                                                                                                                                                                                                                                                                                                                                                                                                                                                                                                                                                                                                                                                                |                                                                                                                                                                                                    |
| <b>Conclusive evaluation</b>  | GRADE rating up/down                                                                                                                                                                                                                                                                                                                                                                                                                                                                                                                                                                                                                                                                                                                                                                                                                                                                                                                                   | Downgraded study                                                                                                                                                                                   |
|                               | GRADE rating                                                                                                                                                                                                                                                                                                                                                                                                                                                                                                                                                                                                                                                                                                                                                                                                                                                                                                                                           | Very low evidence                                                                                                                                                                                  |
|                               | Statistical reporting                                                                                                                                                                                                                                                                                                                                                                                                                                                                                                                                                                                                                                                                                                                                                                                                                                                                                                                                  | Partial                                                                                                                                                                                            |
|                               | Statistical quality                                                                                                                                                                                                                                                                                                                                                                                                                                                                                                                                                                                                                                                                                                                                                                                                                                                                                                                                    | Low                                                                                                                                                                                                |
|                               | External validity issues                                                                                                                                                                                                                                                                                                                                                                                                                                                                                                                                                                                                                                                                                                                                                                                                                                                                                                                               | Yes                                                                                                                                                                                                |
|                               | Final grading                                                                                                                                                                                                                                                                                                                                                                                                                                                                                                                                                                                                                                                                                                                                                                                                                                                                                                                                          | Downgraded study                                                                                                                                                                                   |
| Final level of evidence       | Very low evidence                                                                                                                                                                                                                                                                                                                                                                                                                                                                                                                                                                                                                                                                                                                                                                                                                                                                                                                                      |                                                                                                                                                                                                    |

**Table S2** (continued from the previous page)

|                               |                                                                                                                                                                                                                                                                                                                                                                                                                                                                                                                                                                                                                                                                                                                              |
|-------------------------------|------------------------------------------------------------------------------------------------------------------------------------------------------------------------------------------------------------------------------------------------------------------------------------------------------------------------------------------------------------------------------------------------------------------------------------------------------------------------------------------------------------------------------------------------------------------------------------------------------------------------------------------------------------------------------------------------------------------------------|
| Observational study           | 4                                                                                                                                                                                                                                                                                                                                                                                                                                                                                                                                                                                                                                                                                                                            |
| Year                          | 2013                                                                                                                                                                                                                                                                                                                                                                                                                                                                                                                                                                                                                                                                                                                         |
| Journal                       | JAMA surg                                                                                                                                                                                                                                                                                                                                                                                                                                                                                                                                                                                                                                                                                                                    |
| First Author                  | Holcomb                                                                                                                                                                                                                                                                                                                                                                                                                                                                                                                                                                                                                                                                                                                      |
| Statistical method            | Cox proportional hazards                                                                                                                                                                                                                                                                                                                                                                                                                                                                                                                                                                                                                                                                                                     |
| Inclusion criteria            | Patients requiring the highest level of trauma activation receiving and at least one PRBC unit within 6 hours from admission                                                                                                                                                                                                                                                                                                                                                                                                                                                                                                                                                                                                 |
| Treatment                     | FFP:PRBC ratio $\geq$ 1:1 received between 30 minutes and 6 hours from admission                                                                                                                                                                                                                                                                                                                                                                                                                                                                                                                                                                                                                                             |
| Centres                       | 10                                                                                                                                                                                                                                                                                                                                                                                                                                                                                                                                                                                                                                                                                                                           |
| N° patients/centre/year       | 79                                                                                                                                                                                                                                                                                                                                                                                                                                                                                                                                                                                                                                                                                                                           |
| Study duration (days)         | 406                                                                                                                                                                                                                                                                                                                                                                                                                                                                                                                                                                                                                                                                                                                          |
| Total (included in the model) | 876                                                                                                                                                                                                                                                                                                                                                                                                                                                                                                                                                                                                                                                                                                                          |
|                               | <b>Outcome</b><br>#VALUE!<br><b>Variable: OR (95%-CI)</b><br>FFP:PRBC ratio $\geq$ 1:1: HR 0.23 (95%-CI NA)<br>FFP:PRBC ratio: $\geq$ 1:2-<1:1: HR 0.42 (95%-CI NA)<br>FFP:PRBC ratio < 1:2: HR ref=1 (95%-CI NA)<br>FFP:PRBC (continuous): HR 0.31 (0.16-0.58)                                                                                                                                                                                                                                                                                                                                                                                                                                                              |
| <b>GRADE CRITERIA</b>         |                                                                                                                                                                                                                                                                                                                                                                                                                                                                                                                                                                                                                                                                                                                              |
|                               | <b>Statistical reporting</b> Sufficient for quality assessment                                                                                                                                                                                                                                                                                                                                                                                                                                                                                                                                                                                                                                                               |
|                               | <b>Statistical quality</b> High                                                                                                                                                                                                                                                                                                                                                                                                                                                                                                                                                                                                                                                                                              |
| <b>Downgrading</b>            | GRADE overall 0<br>Indirectness No<br>Imprecision No<br>Other No<br>Publication bias Not assessable<br>Inconsistency with other studies Not assessable                                                                                                                                                                                                                                                                                                                                                                                                                                                                                                                                                                       |
| <b>Up-grading</b>             | Size of effect Large<br>Residual confounding Does not indicate upgrading<br>Dose /response Yes                                                                                                                                                                                                                                                                                                                                                                                                                                                                                                                                                                                                                               |
| <b>DETAILS</b>                |                                                                                                                                                                                                                                                                                                                                                                                                                                                                                                                                                                                                                                                                                                                              |
| <b>Downgrading</b>            | Adequate control for confounding: Insufficient number of variables for an explanatory model.<br>Statistical reporting: Multi-level time-dependent Cox proportional hazards regression.<br>Dichotomization of continuous variables. Goodness-of-fit assessment not reported. Collinearity assessment not reported. Statistical tests for models not reported. Variable selection method: Purposeful variables selection strategy. Reporting of variable coding method not performed.<br>Statistical quality: Sophisticated analysis accounting for survival bias. However, propensity score for different FFP-PRBC ratio approaches would have been indicated but was not performed, potentially generating a selection bias. |
| <b>Up-grading</b>             | Size of effect: Large protective effect generated, however, by a potentially biased model. No upgrading indicated. Dose /response: FFP:PRBC ratio significant as a continuous variable generated, however, by a probably biased model. Upgrading not indicated.                                                                                                                                                                                                                                                                                                                                                                                                                                                              |
| <b>External validity</b>      | Multicenter study, with an adequate number of patients per center                                                                                                                                                                                                                                                                                                                                                                                                                                                                                                                                                                                                                                                            |
| <b>Conclusive evaluation</b>  | GRADE rating up/down No grading modification<br>GRADE rating Low evidence<br>Statistical reporting Sufficient for quality assessment<br>Statistical quality High<br>External validity issues No<br>Final grading No grading modification<br>Final level of evidence Low evidence                                                                                                                                                                                                                                                                                                                                                                                                                                             |

**Table S2** (continued from the previous page)

|                               |                                                                                                                                                                                                                                                                                                                                                                                                                                                                                                                                                                                                                                                                                                                                                                                                                                                                                                                                    |                                                                                                                     |
|-------------------------------|------------------------------------------------------------------------------------------------------------------------------------------------------------------------------------------------------------------------------------------------------------------------------------------------------------------------------------------------------------------------------------------------------------------------------------------------------------------------------------------------------------------------------------------------------------------------------------------------------------------------------------------------------------------------------------------------------------------------------------------------------------------------------------------------------------------------------------------------------------------------------------------------------------------------------------|---------------------------------------------------------------------------------------------------------------------|
| Observational study           | 5                                                                                                                                                                                                                                                                                                                                                                                                                                                                                                                                                                                                                                                                                                                                                                                                                                                                                                                                  |                                                                                                                     |
| Year                          | 2009                                                                                                                                                                                                                                                                                                                                                                                                                                                                                                                                                                                                                                                                                                                                                                                                                                                                                                                               |                                                                                                                     |
| Journal                       | JT                                                                                                                                                                                                                                                                                                                                                                                                                                                                                                                                                                                                                                                                                                                                                                                                                                                                                                                                 |                                                                                                                     |
| First Author                  | Teixeira                                                                                                                                                                                                                                                                                                                                                                                                                                                                                                                                                                                                                                                                                                                                                                                                                                                                                                                           |                                                                                                                     |
| Statistical method            | Logistic regression                                                                                                                                                                                                                                                                                                                                                                                                                                                                                                                                                                                                                                                                                                                                                                                                                                                                                                                |                                                                                                                     |
| Inclusion criteria            | Trauma patients receiving 10 or more PRBC units within the first 24 hours                                                                                                                                                                                                                                                                                                                                                                                                                                                                                                                                                                                                                                                                                                                                                                                                                                                          |                                                                                                                     |
| Treatment                     | FFP:PRBC ratio (continuous variable)                                                                                                                                                                                                                                                                                                                                                                                                                                                                                                                                                                                                                                                                                                                                                                                                                                                                                               |                                                                                                                     |
| Centres                       | 1                                                                                                                                                                                                                                                                                                                                                                                                                                                                                                                                                                                                                                                                                                                                                                                                                                                                                                                                  | <b>Outcome</b><br>Hospital mortality: 161 (42%)<br><b>Variable: OR (95%-CI)</b><br>FFP:PRBC ratio: 0.02 (0.01-0.07) |
| N° patients/centre/year       | 64                                                                                                                                                                                                                                                                                                                                                                                                                                                                                                                                                                                                                                                                                                                                                                                                                                                                                                                                 |                                                                                                                     |
| Study duration (days)         | 2191                                                                                                                                                                                                                                                                                                                                                                                                                                                                                                                                                                                                                                                                                                                                                                                                                                                                                                                               |                                                                                                                     |
| Total (included in the model) | 383                                                                                                                                                                                                                                                                                                                                                                                                                                                                                                                                                                                                                                                                                                                                                                                                                                                                                                                                |                                                                                                                     |
| <b>GRADE CRITERIA</b>         |                                                                                                                                                                                                                                                                                                                                                                                                                                                                                                                                                                                                                                                                                                                                                                                                                                                                                                                                    |                                                                                                                     |
|                               | <b>Statistical reporting</b>                                                                                                                                                                                                                                                                                                                                                                                                                                                                                                                                                                                                                                                                                                                                                                                                                                                                                                       | Partial                                                                                                             |
|                               | <b>Statistical quality</b>                                                                                                                                                                                                                                                                                                                                                                                                                                                                                                                                                                                                                                                                                                                                                                                                                                                                                                         | Low                                                                                                                 |
| <b>Downgrading</b>            | GRADE overall                                                                                                                                                                                                                                                                                                                                                                                                                                                                                                                                                                                                                                                                                                                                                                                                                                                                                                                      | 0                                                                                                                   |
|                               | Indirectness                                                                                                                                                                                                                                                                                                                                                                                                                                                                                                                                                                                                                                                                                                                                                                                                                                                                                                                       | No                                                                                                                  |
|                               | Imprecision                                                                                                                                                                                                                                                                                                                                                                                                                                                                                                                                                                                                                                                                                                                                                                                                                                                                                                                        | No                                                                                                                  |
|                               | Other                                                                                                                                                                                                                                                                                                                                                                                                                                                                                                                                                                                                                                                                                                                                                                                                                                                                                                                              | No                                                                                                                  |
|                               | Publication bias                                                                                                                                                                                                                                                                                                                                                                                                                                                                                                                                                                                                                                                                                                                                                                                                                                                                                                                   | Not assessable                                                                                                      |
| <b>Up-grading</b>             | Inconsistency with other studies                                                                                                                                                                                                                                                                                                                                                                                                                                                                                                                                                                                                                                                                                                                                                                                                                                                                                                   | Not assessable                                                                                                      |
|                               | Size of effect                                                                                                                                                                                                                                                                                                                                                                                                                                                                                                                                                                                                                                                                                                                                                                                                                                                                                                                     | Very large                                                                                                          |
|                               | Residual confounding                                                                                                                                                                                                                                                                                                                                                                                                                                                                                                                                                                                                                                                                                                                                                                                                                                                                                                               | Does not indicate upgrading                                                                                         |
|                               | Dose /response                                                                                                                                                                                                                                                                                                                                                                                                                                                                                                                                                                                                                                                                                                                                                                                                                                                                                                                     | Yes                                                                                                                 |
| <b>DETAILS</b>                |                                                                                                                                                                                                                                                                                                                                                                                                                                                                                                                                                                                                                                                                                                                                                                                                                                                                                                                                    |                                                                                                                     |
| <b>Downgrading</b>            | Adequate control for confounding: Important predictors were not included in the propensity score. Cut-offs for variable dichotomization were arbitrarily defined. Statistical reporting: Logistic regression. No Statistical support reported. Checking for conformity with linear gradient for continuous variables not reported. Test for interaction not reported. Goodness-of-fit assessment not reported. Collinearity assessment not reported. Variable selection method: Stepwise bidirectional elimination after bivariate selection. Reporting of variable coding method not performed. Statistical quality: Insufficient statistical reporting. All continuous variables were arbitrarily dichotomized with the exception of the FFP:PRBC Bivariate variables selection before automatic procedure (stepwise bidirectional elimination). The study did not account for survival bias. No propensity score was developed. |                                                                                                                     |
| <b>Up-grading</b>             | Size of effect: Very large protective effect generated, however, by a potentially biased model. No upgrading indicated. Dose /response: FFP:PRBC ratio significant as a continuous variable generated, however, by a probably biased model. Upgrading not indicated.                                                                                                                                                                                                                                                                                                                                                                                                                                                                                                                                                                                                                                                               |                                                                                                                     |
| <b>External validity</b>      | Single center study.                                                                                                                                                                                                                                                                                                                                                                                                                                                                                                                                                                                                                                                                                                                                                                                                                                                                                                               |                                                                                                                     |
| <b>Conclusive evaluation</b>  | GRADE rating up/down                                                                                                                                                                                                                                                                                                                                                                                                                                                                                                                                                                                                                                                                                                                                                                                                                                                                                                               | Downgraded study                                                                                                    |
|                               | GRADE rating                                                                                                                                                                                                                                                                                                                                                                                                                                                                                                                                                                                                                                                                                                                                                                                                                                                                                                                       | Very low evidence                                                                                                   |
|                               | Statistical reporting                                                                                                                                                                                                                                                                                                                                                                                                                                                                                                                                                                                                                                                                                                                                                                                                                                                                                                              | Partial                                                                                                             |
|                               | Statistical quality                                                                                                                                                                                                                                                                                                                                                                                                                                                                                                                                                                                                                                                                                                                                                                                                                                                                                                                | Low                                                                                                                 |
|                               | External validity issues                                                                                                                                                                                                                                                                                                                                                                                                                                                                                                                                                                                                                                                                                                                                                                                                                                                                                                           | Yes                                                                                                                 |
|                               | Final grading                                                                                                                                                                                                                                                                                                                                                                                                                                                                                                                                                                                                                                                                                                                                                                                                                                                                                                                      | Downgraded study                                                                                                    |
|                               | Final level of evidence                                                                                                                                                                                                                                                                                                                                                                                                                                                                                                                                                                                                                                                                                                                                                                                                                                                                                                            | Very low evidence                                                                                                   |

**Table S2** (continued from the previous page)

|                               |                                                                                                                                                                                                                                                                                                                                                                                                                                                                                                                                                                                                                                                                                                                                                                                                                                                                                                  |                                                                                                                                    |
|-------------------------------|--------------------------------------------------------------------------------------------------------------------------------------------------------------------------------------------------------------------------------------------------------------------------------------------------------------------------------------------------------------------------------------------------------------------------------------------------------------------------------------------------------------------------------------------------------------------------------------------------------------------------------------------------------------------------------------------------------------------------------------------------------------------------------------------------------------------------------------------------------------------------------------------------|------------------------------------------------------------------------------------------------------------------------------------|
| Observational                 | 6                                                                                                                                                                                                                                                                                                                                                                                                                                                                                                                                                                                                                                                                                                                                                                                                                                                                                                |                                                                                                                                    |
| Year                          | 2011                                                                                                                                                                                                                                                                                                                                                                                                                                                                                                                                                                                                                                                                                                                                                                                                                                                                                             |                                                                                                                                    |
| Journal                       | JT                                                                                                                                                                                                                                                                                                                                                                                                                                                                                                                                                                                                                                                                                                                                                                                                                                                                                               |                                                                                                                                    |
| First Author                  | Sambavisan                                                                                                                                                                                                                                                                                                                                                                                                                                                                                                                                                                                                                                                                                                                                                                                                                                                                                       |                                                                                                                                    |
| Statistical method            | Cox proportional hazards including propensity score                                                                                                                                                                                                                                                                                                                                                                                                                                                                                                                                                                                                                                                                                                                                                                                                                                              |                                                                                                                                    |
| Inclusion criteria            | Patients receiving at least one but less than 10 PRBC units within 24 hours from admission (excluding deaths occurred within 2 hours)                                                                                                                                                                                                                                                                                                                                                                                                                                                                                                                                                                                                                                                                                                                                                            |                                                                                                                                    |
| Treatment                     | FFP:PRBC ratio $\geq 1$                                                                                                                                                                                                                                                                                                                                                                                                                                                                                                                                                                                                                                                                                                                                                                                                                                                                          |                                                                                                                                    |
| Centres                       | 23                                                                                                                                                                                                                                                                                                                                                                                                                                                                                                                                                                                                                                                                                                                                                                                                                                                                                               | <b>Outcome</b><br>Hospital mortality: 173 (14.6%)<br><b>Variable: OR (95%-CI)</b><br>FFP:PRBC ratio $\geq 1$ : HR 0.87 (0.55-1.38) |
| N° patients/centre/year       | 22                                                                                                                                                                                                                                                                                                                                                                                                                                                                                                                                                                                                                                                                                                                                                                                                                                                                                               |                                                                                                                                    |
| Study duration (days)         | 851                                                                                                                                                                                                                                                                                                                                                                                                                                                                                                                                                                                                                                                                                                                                                                                                                                                                                              |                                                                                                                                    |
| Total (included in the model) | 1181                                                                                                                                                                                                                                                                                                                                                                                                                                                                                                                                                                                                                                                                                                                                                                                                                                                                                             |                                                                                                                                    |
| <b>GRADE CRITERIA</b>         |                                                                                                                                                                                                                                                                                                                                                                                                                                                                                                                                                                                                                                                                                                                                                                                                                                                                                                  |                                                                                                                                    |
|                               | <b>Statistical reporting</b>                                                                                                                                                                                                                                                                                                                                                                                                                                                                                                                                                                                                                                                                                                                                                                                                                                                                     | Partial                                                                                                                            |
|                               | <b>Statistical quality</b>                                                                                                                                                                                                                                                                                                                                                                                                                                                                                                                                                                                                                                                                                                                                                                                                                                                                       | Low                                                                                                                                |
| <b>Downgrading</b>            | GRADE overall                                                                                                                                                                                                                                                                                                                                                                                                                                                                                                                                                                                                                                                                                                                                                                                                                                                                                    | 0                                                                                                                                  |
|                               | Indirectness                                                                                                                                                                                                                                                                                                                                                                                                                                                                                                                                                                                                                                                                                                                                                                                                                                                                                     | No                                                                                                                                 |
|                               | Imprecision                                                                                                                                                                                                                                                                                                                                                                                                                                                                                                                                                                                                                                                                                                                                                                                                                                                                                      | No                                                                                                                                 |
|                               | Other                                                                                                                                                                                                                                                                                                                                                                                                                                                                                                                                                                                                                                                                                                                                                                                                                                                                                            | No                                                                                                                                 |
| <b>Up-grading</b>             | Publication bias                                                                                                                                                                                                                                                                                                                                                                                                                                                                                                                                                                                                                                                                                                                                                                                                                                                                                 | Not assessable                                                                                                                     |
|                               | Inconsistency with other studies                                                                                                                                                                                                                                                                                                                                                                                                                                                                                                                                                                                                                                                                                                                                                                                                                                                                 | Not assessable                                                                                                                     |
|                               | Size of effect                                                                                                                                                                                                                                                                                                                                                                                                                                                                                                                                                                                                                                                                                                                                                                                                                                                                                   | Not relevant                                                                                                                       |
|                               | Residual confounding                                                                                                                                                                                                                                                                                                                                                                                                                                                                                                                                                                                                                                                                                                                                                                                                                                                                             | Does not indicate upgrading                                                                                                        |
|                               | Dose /response                                                                                                                                                                                                                                                                                                                                                                                                                                                                                                                                                                                                                                                                                                                                                                                                                                                                                   | Not applicable                                                                                                                     |
| <b>DETAILS</b>                |                                                                                                                                                                                                                                                                                                                                                                                                                                                                                                                                                                                                                                                                                                                                                                                                                                                                                                  |                                                                                                                                    |
| <b>Downgrading</b>            | Adequate control for confounding: Only five variables remained in the final model, insufficient number for explanatory purposes. Few variables were also included in the propensity score. Statistical reporting: Proportional hazards including propensity score. Checking for conformity with linear gradient for continuous variables not reported. Test for interaction not reported. Goodness-of-fit assessment not reported. Collinearity assessment not reported. Statistical tests for models not reported. Variable selection method: Stepwise forward selection. Reporting of variable coding method not indicated. Statistical quality: Insufficient statistical reporting. Hazard proportional assumption not checked. Few variables entered the mortality model and important covariates were not considered. Low statistical quality. The study did not account for survival bias. |                                                                                                                                    |
| <b>Up-grading</b>             |                                                                                                                                                                                                                                                                                                                                                                                                                                                                                                                                                                                                                                                                                                                                                                                                                                                                                                  |                                                                                                                                    |
| <b>External validity</b>      | Multicenter study, with an acceptable number of patients treated per center.                                                                                                                                                                                                                                                                                                                                                                                                                                                                                                                                                                                                                                                                                                                                                                                                                     |                                                                                                                                    |
| <b>Conclusive evaluation</b>  | GRADE rating up/down                                                                                                                                                                                                                                                                                                                                                                                                                                                                                                                                                                                                                                                                                                                                                                                                                                                                             | Downgraded study                                                                                                                   |
|                               | GRADE rating                                                                                                                                                                                                                                                                                                                                                                                                                                                                                                                                                                                                                                                                                                                                                                                                                                                                                     | Very low evidence                                                                                                                  |
|                               | Statistical reporting                                                                                                                                                                                                                                                                                                                                                                                                                                                                                                                                                                                                                                                                                                                                                                                                                                                                            | Partial                                                                                                                            |
|                               | Statistical quality                                                                                                                                                                                                                                                                                                                                                                                                                                                                                                                                                                                                                                                                                                                                                                                                                                                                              | Low                                                                                                                                |
|                               | External validity issues                                                                                                                                                                                                                                                                                                                                                                                                                                                                                                                                                                                                                                                                                                                                                                                                                                                                         | Yes                                                                                                                                |
|                               | Final grading                                                                                                                                                                                                                                                                                                                                                                                                                                                                                                                                                                                                                                                                                                                                                                                                                                                                                    | Downgraded study                                                                                                                   |
|                               | Final level of evidence                                                                                                                                                                                                                                                                                                                                                                                                                                                                                                                                                                                                                                                                                                                                                                                                                                                                          | Very low evidence                                                                                                                  |



**Table S2** (continued from the previous page)

|                               |                                                                                                                                                                                                                                                                                                                                                                                                                                                                                                                                                                                                                                                                                                                                                                                                                                   |                                                                                                                        |
|-------------------------------|-----------------------------------------------------------------------------------------------------------------------------------------------------------------------------------------------------------------------------------------------------------------------------------------------------------------------------------------------------------------------------------------------------------------------------------------------------------------------------------------------------------------------------------------------------------------------------------------------------------------------------------------------------------------------------------------------------------------------------------------------------------------------------------------------------------------------------------|------------------------------------------------------------------------------------------------------------------------|
| Observational                 | 7                                                                                                                                                                                                                                                                                                                                                                                                                                                                                                                                                                                                                                                                                                                                                                                                                                 |                                                                                                                        |
| Year                          | 2011                                                                                                                                                                                                                                                                                                                                                                                                                                                                                                                                                                                                                                                                                                                                                                                                                              |                                                                                                                        |
| Journal                       | JT                                                                                                                                                                                                                                                                                                                                                                                                                                                                                                                                                                                                                                                                                                                                                                                                                                |                                                                                                                        |
| First Author                  | Holcomb                                                                                                                                                                                                                                                                                                                                                                                                                                                                                                                                                                                                                                                                                                                                                                                                                           |                                                                                                                        |
| Statistical method            | Cox proportional hazards including propensity score                                                                                                                                                                                                                                                                                                                                                                                                                                                                                                                                                                                                                                                                                                                                                                               |                                                                                                                        |
| Inclusion criteria            | Trauma patients receiving 10 or more PRBC units within 24 hours from admission                                                                                                                                                                                                                                                                                                                                                                                                                                                                                                                                                                                                                                                                                                                                                    |                                                                                                                        |
| Treatment                     | FFP:PRBC ratio (continuous variable)                                                                                                                                                                                                                                                                                                                                                                                                                                                                                                                                                                                                                                                                                                                                                                                              |                                                                                                                        |
| Centres                       | 22                                                                                                                                                                                                                                                                                                                                                                                                                                                                                                                                                                                                                                                                                                                                                                                                                                | <b>Outcome</b><br>30-day mortality: 181 (28.1%)<br><b>Variable: OR (95%-CI)</b><br>FFP:PRBC ratio: HR 0.49 (0.28-0.86) |
| N° patients/centre/year       | 29                                                                                                                                                                                                                                                                                                                                                                                                                                                                                                                                                                                                                                                                                                                                                                                                                                |                                                                                                                        |
| Study duration (days)         | 364                                                                                                                                                                                                                                                                                                                                                                                                                                                                                                                                                                                                                                                                                                                                                                                                                               |                                                                                                                        |
| Total (included in the model) | 643                                                                                                                                                                                                                                                                                                                                                                                                                                                                                                                                                                                                                                                                                                                                                                                                                               |                                                                                                                        |
| <b>GRADE CRITERIA</b>         |                                                                                                                                                                                                                                                                                                                                                                                                                                                                                                                                                                                                                                                                                                                                                                                                                                   |                                                                                                                        |
|                               | <b>Statistical reporting</b>                                                                                                                                                                                                                                                                                                                                                                                                                                                                                                                                                                                                                                                                                                                                                                                                      | Partial                                                                                                                |
|                               | <b>Statistical quality</b>                                                                                                                                                                                                                                                                                                                                                                                                                                                                                                                                                                                                                                                                                                                                                                                                        | Low                                                                                                                    |
| Downgrading                   | GRADE overall                                                                                                                                                                                                                                                                                                                                                                                                                                                                                                                                                                                                                                                                                                                                                                                                                     | 0                                                                                                                      |
|                               | Indirectness                                                                                                                                                                                                                                                                                                                                                                                                                                                                                                                                                                                                                                                                                                                                                                                                                      | No                                                                                                                     |
|                               | Imprecision                                                                                                                                                                                                                                                                                                                                                                                                                                                                                                                                                                                                                                                                                                                                                                                                                       | No                                                                                                                     |
|                               | Other                                                                                                                                                                                                                                                                                                                                                                                                                                                                                                                                                                                                                                                                                                                                                                                                                             | No                                                                                                                     |
|                               | Publication bias                                                                                                                                                                                                                                                                                                                                                                                                                                                                                                                                                                                                                                                                                                                                                                                                                  | Not assessable                                                                                                         |
| Up-grading                    | Inconsistency with other studies                                                                                                                                                                                                                                                                                                                                                                                                                                                                                                                                                                                                                                                                                                                                                                                                  | Not assessable                                                                                                         |
|                               | Size of effect                                                                                                                                                                                                                                                                                                                                                                                                                                                                                                                                                                                                                                                                                                                                                                                                                    | Large                                                                                                                  |
|                               | Residual confounding                                                                                                                                                                                                                                                                                                                                                                                                                                                                                                                                                                                                                                                                                                                                                                                                              | Does not indicate upgrading                                                                                            |
|                               | Dose /response                                                                                                                                                                                                                                                                                                                                                                                                                                                                                                                                                                                                                                                                                                                                                                                                                    | Yes                                                                                                                    |
| <b>DETAILS</b>                |                                                                                                                                                                                                                                                                                                                                                                                                                                                                                                                                                                                                                                                                                                                                                                                                                                   |                                                                                                                        |
| Downgrading                   | <p>Adequate control for confounding: Few variables included in the final model, insufficient for explanatory purposes. Statistical reporting: Statistical model: Cox proportional hazards. No Statistical support reported. Checking for conformity with linear gradient for continuous variables not reported. Test for interaction not reported. Goodness-of-fit assessment not reported. Collinearity assessment not reported. Statistical tests for models not reported. Variable selection method: Not Reported. Reporting of variable coding method not performed. Statistical quality: Insufficient statistical reporting. Important covariates (e.g. age) were not included in the mortality model (underfitting). No propensity score for FFP:PRBC ratio was developed. The study did not account for survival bias.</p> |                                                                                                                        |
| Up-grading                    | <p>Size of effect: Large protective effect generated, however, by a potentially biased model. No upgrading indicated. Dose /response: FFP:PRBC ratio significant as a continuous variable generated, however, by a probably biased model. Upgrading not indicated.</p>                                                                                                                                                                                                                                                                                                                                                                                                                                                                                                                                                            |                                                                                                                        |
| <b>External validity</b>      | Multicenter study, with an acceptable number of patients treated per center.                                                                                                                                                                                                                                                                                                                                                                                                                                                                                                                                                                                                                                                                                                                                                      |                                                                                                                        |
| <b>Conclusive evaluation</b>  | GRADE rating up/down                                                                                                                                                                                                                                                                                                                                                                                                                                                                                                                                                                                                                                                                                                                                                                                                              | Downgraded study                                                                                                       |
|                               | GRADE rating                                                                                                                                                                                                                                                                                                                                                                                                                                                                                                                                                                                                                                                                                                                                                                                                                      | Very low evidence                                                                                                      |
|                               | Statistical reporting                                                                                                                                                                                                                                                                                                                                                                                                                                                                                                                                                                                                                                                                                                                                                                                                             | Partial                                                                                                                |
|                               | Statistical quality                                                                                                                                                                                                                                                                                                                                                                                                                                                                                                                                                                                                                                                                                                                                                                                                               | Low                                                                                                                    |
|                               | External validity issues                                                                                                                                                                                                                                                                                                                                                                                                                                                                                                                                                                                                                                                                                                                                                                                                          | No                                                                                                                     |
|                               | Final grading                                                                                                                                                                                                                                                                                                                                                                                                                                                                                                                                                                                                                                                                                                                                                                                                                     | Downgraded study                                                                                                       |
|                               | Final level of evidence                                                                                                                                                                                                                                                                                                                                                                                                                                                                                                                                                                                                                                                                                                                                                                                                           | Very low evidence                                                                                                      |

**Table S2** (continued from the previous page)

|                               |                                                                                                                                                                                                                                                                                                                                                                                                                                                                                                                                                                                                                                                                                                                                                                                                                                                                                                                            |                                                                                                                               |
|-------------------------------|----------------------------------------------------------------------------------------------------------------------------------------------------------------------------------------------------------------------------------------------------------------------------------------------------------------------------------------------------------------------------------------------------------------------------------------------------------------------------------------------------------------------------------------------------------------------------------------------------------------------------------------------------------------------------------------------------------------------------------------------------------------------------------------------------------------------------------------------------------------------------------------------------------------------------|-------------------------------------------------------------------------------------------------------------------------------|
| Observational                 | 8                                                                                                                                                                                                                                                                                                                                                                                                                                                                                                                                                                                                                                                                                                                                                                                                                                                                                                                          |                                                                                                                               |
| Year                          | 2011                                                                                                                                                                                                                                                                                                                                                                                                                                                                                                                                                                                                                                                                                                                                                                                                                                                                                                                       |                                                                                                                               |
| Journal                       | VS                                                                                                                                                                                                                                                                                                                                                                                                                                                                                                                                                                                                                                                                                                                                                                                                                                                                                                                         |                                                                                                                               |
| First Author                  | Borgman                                                                                                                                                                                                                                                                                                                                                                                                                                                                                                                                                                                                                                                                                                                                                                                                                                                                                                                    |                                                                                                                               |
| Statistical method            | Logistic regression                                                                                                                                                                                                                                                                                                                                                                                                                                                                                                                                                                                                                                                                                                                                                                                                                                                                                                        |                                                                                                                               |
| Inclusion criteria            | TASH score $\geq 15$ excluding patients died within 1 hour from admission                                                                                                                                                                                                                                                                                                                                                                                                                                                                                                                                                                                                                                                                                                                                                                                                                                                  |                                                                                                                               |
| Treatment                     | FFP:PRBC ratio (continuous variable)                                                                                                                                                                                                                                                                                                                                                                                                                                                                                                                                                                                                                                                                                                                                                                                                                                                                                       |                                                                                                                               |
| Centres                       | 100                                                                                                                                                                                                                                                                                                                                                                                                                                                                                                                                                                                                                                                                                                                                                                                                                                                                                                                        | <b>Outcome</b><br>Hospital mortality: NA (NA%)<br><b>Variable: OR (95%-CI)</b><br>FFP:PRBC ratio: Survival OR 2.5 (1.56-4.00) |
| N° patients/centre/year       | 1                                                                                                                                                                                                                                                                                                                                                                                                                                                                                                                                                                                                                                                                                                                                                                                                                                                                                                                          |                                                                                                                               |
| Study duration (days)         | 2190                                                                                                                                                                                                                                                                                                                                                                                                                                                                                                                                                                                                                                                                                                                                                                                                                                                                                                                       |                                                                                                                               |
| Total (included in the model) | 557                                                                                                                                                                                                                                                                                                                                                                                                                                                                                                                                                                                                                                                                                                                                                                                                                                                                                                                        |                                                                                                                               |
| <b>GRADE CRITERIA</b>         |                                                                                                                                                                                                                                                                                                                                                                                                                                                                                                                                                                                                                                                                                                                                                                                                                                                                                                                            |                                                                                                                               |
|                               | <b>Statistical reporting</b>                                                                                                                                                                                                                                                                                                                                                                                                                                                                                                                                                                                                                                                                                                                                                                                                                                                                                               | Partial                                                                                                                       |
|                               | <b>Statistical quality</b>                                                                                                                                                                                                                                                                                                                                                                                                                                                                                                                                                                                                                                                                                                                                                                                                                                                                                                 | Low                                                                                                                           |
| Downgrading                   | GRADE overall                                                                                                                                                                                                                                                                                                                                                                                                                                                                                                                                                                                                                                                                                                                                                                                                                                                                                                              | 0                                                                                                                             |
|                               | Indirectness                                                                                                                                                                                                                                                                                                                                                                                                                                                                                                                                                                                                                                                                                                                                                                                                                                                                                                               | No                                                                                                                            |
|                               | Imprecision                                                                                                                                                                                                                                                                                                                                                                                                                                                                                                                                                                                                                                                                                                                                                                                                                                                                                                                | No                                                                                                                            |
|                               | Other                                                                                                                                                                                                                                                                                                                                                                                                                                                                                                                                                                                                                                                                                                                                                                                                                                                                                                                      | No                                                                                                                            |
|                               | Publication bias                                                                                                                                                                                                                                                                                                                                                                                                                                                                                                                                                                                                                                                                                                                                                                                                                                                                                                           | Not assessable                                                                                                                |
| Up-grading                    | Inconsistency with other studies                                                                                                                                                                                                                                                                                                                                                                                                                                                                                                                                                                                                                                                                                                                                                                                                                                                                                           | Not assessable                                                                                                                |
|                               | Size of effect                                                                                                                                                                                                                                                                                                                                                                                                                                                                                                                                                                                                                                                                                                                                                                                                                                                                                                             | Large                                                                                                                         |
|                               | Residual confounding                                                                                                                                                                                                                                                                                                                                                                                                                                                                                                                                                                                                                                                                                                                                                                                                                                                                                                       | Does not indicate upgrading                                                                                                   |
|                               | Dose /response                                                                                                                                                                                                                                                                                                                                                                                                                                                                                                                                                                                                                                                                                                                                                                                                                                                                                                             | Yes                                                                                                                           |
| <b>DETAILS</b>                |                                                                                                                                                                                                                                                                                                                                                                                                                                                                                                                                                                                                                                                                                                                                                                                                                                                                                                                            |                                                                                                                               |
| Downgrading                   | Adequate control for confounding: Only three variables remained in the final model, insufficient number for explanatory purposes. Few variables were also included in the propensity score. Statistical reporting: Statistical model: Logistic regression. No Statistical support reported. Checking for conformity with linear gradient for continuous variables not reported. Test for interaction not reported. Internal validity assessment not reported. Goodness-of-fit assessment not reported. Collinearity assessment not reported. Statistical tests for models not reported. Reporting of variable coding method not indicated. Statistical quality: Insufficient statistical reporting. No propensity score for treatment performed. Variable selection method: Bivariate analysis. Only three variables entered the model that was clearly underfitted. no propensity score for FFP:PRBC ratio was developed. |                                                                                                                               |
| Up-grading                    | Size of effect: Large protective effect generated, however, by a potentially biased model. No upgrading indicated. Dose /response: FFP:PRBC ratio significant as a continuous variable generated, however, by a probably biased model. Upgrading not indicated.                                                                                                                                                                                                                                                                                                                                                                                                                                                                                                                                                                                                                                                            |                                                                                                                               |
| <b>External validity</b>      | Multicenter study, with 1 patients admitted per center on average. Probably several centers did not enroll patients. Inadequate reporting.                                                                                                                                                                                                                                                                                                                                                                                                                                                                                                                                                                                                                                                                                                                                                                                 |                                                                                                                               |
| <b>Conclusive evaluation</b>  | GRADE rating up/down                                                                                                                                                                                                                                                                                                                                                                                                                                                                                                                                                                                                                                                                                                                                                                                                                                                                                                       | Downgraded study                                                                                                              |
|                               | GRADE rating                                                                                                                                                                                                                                                                                                                                                                                                                                                                                                                                                                                                                                                                                                                                                                                                                                                                                                               | Very low evidence                                                                                                             |
|                               | Statistical reporting                                                                                                                                                                                                                                                                                                                                                                                                                                                                                                                                                                                                                                                                                                                                                                                                                                                                                                      | Partial                                                                                                                       |
|                               | Statistical quality                                                                                                                                                                                                                                                                                                                                                                                                                                                                                                                                                                                                                                                                                                                                                                                                                                                                                                        | Low                                                                                                                           |
|                               | External validity issues                                                                                                                                                                                                                                                                                                                                                                                                                                                                                                                                                                                                                                                                                                                                                                                                                                                                                                   | Yes                                                                                                                           |
|                               | Final grading                                                                                                                                                                                                                                                                                                                                                                                                                                                                                                                                                                                                                                                                                                                                                                                                                                                                                                              | Downgraded study                                                                                                              |
|                               | Final level of evidence                                                                                                                                                                                                                                                                                                                                                                                                                                                                                                                                                                                                                                                                                                                                                                                                                                                                                                    | Very low evidence                                                                                                             |

**Table S2** (continued from the previous page)

|                               |                                                                                                                                                                                                                                                                                                                                                                                                                                                                                                                                                                                                                                                                                                                                                                                                                                                     |                                                                                |
|-------------------------------|-----------------------------------------------------------------------------------------------------------------------------------------------------------------------------------------------------------------------------------------------------------------------------------------------------------------------------------------------------------------------------------------------------------------------------------------------------------------------------------------------------------------------------------------------------------------------------------------------------------------------------------------------------------------------------------------------------------------------------------------------------------------------------------------------------------------------------------------------------|--------------------------------------------------------------------------------|
| Observational                 | 9                                                                                                                                                                                                                                                                                                                                                                                                                                                                                                                                                                                                                                                                                                                                                                                                                                                   |                                                                                |
| Year                          | 2010                                                                                                                                                                                                                                                                                                                                                                                                                                                                                                                                                                                                                                                                                                                                                                                                                                                |                                                                                |
| Journal                       | Injury                                                                                                                                                                                                                                                                                                                                                                                                                                                                                                                                                                                                                                                                                                                                                                                                                                              |                                                                                |
| First Author                  | Mitra                                                                                                                                                                                                                                                                                                                                                                                                                                                                                                                                                                                                                                                                                                                                                                                                                                               |                                                                                |
| Statistical method            | Logistic regression                                                                                                                                                                                                                                                                                                                                                                                                                                                                                                                                                                                                                                                                                                                                                                                                                                 |                                                                                |
| Inclusion criteria            | Patients receiving more than 4 packed red blood cell units within 4 hours from admission                                                                                                                                                                                                                                                                                                                                                                                                                                                                                                                                                                                                                                                                                                                                                            |                                                                                |
| Treatment                     | FFP:PRBC ratio measured at 4 hours from admission (continuous variable)                                                                                                                                                                                                                                                                                                                                                                                                                                                                                                                                                                                                                                                                                                                                                                             |                                                                                |
| Centres                       | 1                                                                                                                                                                                                                                                                                                                                                                                                                                                                                                                                                                                                                                                                                                                                                                                                                                                   | <b>Outcome</b><br>30-day mortality: 99 (29.9%)<br><b>Variable: OR (95%-CI)</b> |
| N° patients/centre/year       | 90                                                                                                                                                                                                                                                                                                                                                                                                                                                                                                                                                                                                                                                                                                                                                                                                                                                  | FFP:PRBC ratio: 0.15 (0.05-0.48)                                               |
| Study duration (days)         | 1338                                                                                                                                                                                                                                                                                                                                                                                                                                                                                                                                                                                                                                                                                                                                                                                                                                                |                                                                                |
| Total (included in the model) | 331                                                                                                                                                                                                                                                                                                                                                                                                                                                                                                                                                                                                                                                                                                                                                                                                                                                 |                                                                                |
| <b>GRADE CRITERIA</b>         |                                                                                                                                                                                                                                                                                                                                                                                                                                                                                                                                                                                                                                                                                                                                                                                                                                                     |                                                                                |
|                               | <b>Statistical reporting</b>                                                                                                                                                                                                                                                                                                                                                                                                                                                                                                                                                                                                                                                                                                                                                                                                                        | Partial                                                                        |
|                               | <b>Statistical quality</b>                                                                                                                                                                                                                                                                                                                                                                                                                                                                                                                                                                                                                                                                                                                                                                                                                          | Low                                                                            |
| <b>Downgrading</b>            | GRADE overall                                                                                                                                                                                                                                                                                                                                                                                                                                                                                                                                                                                                                                                                                                                                                                                                                                       | 0                                                                              |
|                               | Indirectness                                                                                                                                                                                                                                                                                                                                                                                                                                                                                                                                                                                                                                                                                                                                                                                                                                        | No                                                                             |
|                               | Imprecision                                                                                                                                                                                                                                                                                                                                                                                                                                                                                                                                                                                                                                                                                                                                                                                                                                         | No                                                                             |
|                               | Other                                                                                                                                                                                                                                                                                                                                                                                                                                                                                                                                                                                                                                                                                                                                                                                                                                               | No                                                                             |
|                               | Publication bias                                                                                                                                                                                                                                                                                                                                                                                                                                                                                                                                                                                                                                                                                                                                                                                                                                    | Not assessable                                                                 |
| <b>Up-grading</b>             | Inconsistency with other studies                                                                                                                                                                                                                                                                                                                                                                                                                                                                                                                                                                                                                                                                                                                                                                                                                    | Not assessable                                                                 |
|                               | Size of effect                                                                                                                                                                                                                                                                                                                                                                                                                                                                                                                                                                                                                                                                                                                                                                                                                                      | Very large                                                                     |
|                               | Residual confounding                                                                                                                                                                                                                                                                                                                                                                                                                                                                                                                                                                                                                                                                                                                                                                                                                                | Does not indicate upgrading                                                    |
|                               | Dose /response                                                                                                                                                                                                                                                                                                                                                                                                                                                                                                                                                                                                                                                                                                                                                                                                                                      | Yes                                                                            |
| <b>DETAILS</b>                |                                                                                                                                                                                                                                                                                                                                                                                                                                                                                                                                                                                                                                                                                                                                                                                                                                                     |                                                                                |
| <b>Downgrading</b>            | Adequate control for confounding: Only five variables remained in the final model, insufficient number for explanatory purposes. Few variables were also included in the propensity score. Statistical reporting: Logistic regression. Checking for conformity with linear gradient for continuous variables not reported. Test for interaction not reported. Internal validity assessment not reported. Goodness-of-fit assessment not reported. Collinearity assessment not reported. Statistical tests for models not reported. Variable selection method: Stepwise backward elimination. Reporting of variable coding method not indicated. Statistical quality: Insufficient statistical reporting. Possible underfitting of the model, no propensity score for FFP administration was developed. The study did not account for survival bias. |                                                                                |
| <b>Up-grading</b>             | Size of effect: Large protective effect generated, however, by a potentially biased model. No upgrading indicated. Dose /response: FFP:PRBC ratio significant as a continuous variable generated, however, by a probably biased model. Upgrading not indicated.                                                                                                                                                                                                                                                                                                                                                                                                                                                                                                                                                                                     |                                                                                |
| <b>External validity</b>      | Single center study                                                                                                                                                                                                                                                                                                                                                                                                                                                                                                                                                                                                                                                                                                                                                                                                                                 |                                                                                |
| <b>Conclusive evaluation</b>  | GRADE rating up/down                                                                                                                                                                                                                                                                                                                                                                                                                                                                                                                                                                                                                                                                                                                                                                                                                                | Downgraded study                                                               |
|                               | GRADE rating                                                                                                                                                                                                                                                                                                                                                                                                                                                                                                                                                                                                                                                                                                                                                                                                                                        | Very low evidence                                                              |
|                               | Statistical reporting                                                                                                                                                                                                                                                                                                                                                                                                                                                                                                                                                                                                                                                                                                                                                                                                                               | Partial                                                                        |
|                               | Statistical quality                                                                                                                                                                                                                                                                                                                                                                                                                                                                                                                                                                                                                                                                                                                                                                                                                                 | Low                                                                            |
|                               | External validity issues                                                                                                                                                                                                                                                                                                                                                                                                                                                                                                                                                                                                                                                                                                                                                                                                                            | Yes                                                                            |
|                               | Final grading                                                                                                                                                                                                                                                                                                                                                                                                                                                                                                                                                                                                                                                                                                                                                                                                                                       | Downgraded study                                                               |
|                               | Final level of evidence                                                                                                                                                                                                                                                                                                                                                                                                                                                                                                                                                                                                                                                                                                                                                                                                                             | Very low evidence                                                              |

**Table S2** (continued from the previous page)

|                              |                                                                       |                                        |                                   |
|------------------------------|-----------------------------------------------------------------------|----------------------------------------|-----------------------------------|
| RCT 1                        |                                                                       |                                        |                                   |
| Year                         | 2015                                                                  | First Author                           | Holcomb                           |
| Journal                      | JAMA                                                                  |                                        |                                   |
| Sample                       | trauma patients for whom the highest level of activation was required |                                        |                                   |
| Treatment                    | FFP/Platelets/PRBC ratio 1:1:1                                        |                                        |                                   |
| Control                      | FFP/Platelets/PRBC ratio 1:1:2                                        |                                        |                                   |
| Outcome                      | 24-hour mortality                                                     |                                        |                                   |
|                              |                                                                       |                                        | Outcome                           |
|                              | n° pz                                                                 | n                                      | %                                 |
| Treatment                    | 335                                                                   | 43                                     | 12.8                              |
| Control                      | 341                                                                   | 58                                     | 17.0                              |
| Total                        | 676                                                                   | 101                                    | 14.9                              |
| Centres                      | 12 Centres                                                            |                                        |                                   |
| Power                        | 0.332                                                                 | TB 24 (95%-CI NNTB 10 to ∞ to NNTH 82) |                                   |
| GRADE CRITERIA               |                                                                       |                                        |                                   |
| Downgrading                  | Allocation concealment                                                |                                        | Yes                               |
|                              | Intention to treat principle observed                                 |                                        | Yes                               |
|                              | Blinding                                                              |                                        | No                                |
|                              | Completement of follow-up                                             |                                        | Yes                               |
|                              | Early stopping                                                        |                                        | Yes                               |
|                              | Bias                                                                  |                                        | No                                |
|                              | Indirectness                                                          |                                        | No                                |
|                              | Imprecision                                                           |                                        | No                                |
|                              | Publication bias                                                      |                                        | No                                |
|                              | Inconsistency with other trials                                       |                                        | Not assessable                    |
| Up-grading                   | Size of effect                                                        |                                        | Not relevant                      |
|                              | Residual confounding                                                  |                                        | Not assessable                    |
|                              | Dose /response                                                        |                                        | Not relevant                      |
| DETAILS                      |                                                                       |                                        |                                   |
| Downgrading                  |                                                                       |                                        |                                   |
| Up-grading                   |                                                                       |                                        |                                   |
| <b>Conclusive evaluation</b> | GRADE rating up/down                                                  |                                        | No grading modification           |
|                              | GRADE rating                                                          |                                        | High evidence                     |
|                              | Statistical reporting                                                 |                                        | Sufficient for quality assessment |
|                              | Methodological and statistical quality                                |                                        | High                              |
|                              | External validity issues                                              |                                        | Yes                               |
|                              | Final grading                                                         |                                        | No grading modification           |
|                              | Final level of evidence                                               |                                        | High evidence                     |

**Table S2** (continued from the previous page)

|                              |                                                                       |                                        |                                   |
|------------------------------|-----------------------------------------------------------------------|----------------------------------------|-----------------------------------|
| RCT 2                        |                                                                       |                                        |                                   |
| Year                         | 2015                                                                  | First Author                           | Holcomb                           |
| Journal                      | JAMA                                                                  |                                        |                                   |
| Sample                       | trauma patients for whom the highest level of activation was required |                                        |                                   |
| Treatment                    | FFP/Platelets/PRBC ratio 1:1:1                                        |                                        |                                   |
| Control                      | FFP/Platelets/PRBC ratio 1:1:2                                        |                                        |                                   |
| Outcome                      | 30-day mortality                                                      |                                        |                                   |
|                              |                                                                       |                                        | Outcome                           |
|                              | n° pz                                                                 | n                                      | %                                 |
| Treatment                    | 335                                                                   | 75                                     | 22.4                              |
| Control                      | 341                                                                   | 89                                     | 26.1                              |
| Total                        | 676                                                                   | 164                                    | 24.3                              |
| Centres                      | Single Center                                                         |                                        |                                   |
| Power                        | 0.202                                                                 | TB 27 (95%-CI NNTB 10 to ∞ to NNTH 36) |                                   |
| GRADE CRITERIA               |                                                                       |                                        |                                   |
| Downgrading                  | Allocation concealment                                                |                                        | Yes                               |
|                              | Intention to treat principle observed                                 |                                        | Yes                               |
|                              | Blinding                                                              |                                        | Yes                               |
|                              | Completement of follow-up                                             |                                        | Yes                               |
|                              | Early stopping                                                        |                                        | No                                |
|                              | Statistical reporting                                                 |                                        | Sufficient for quality assessment |
|                              | Methodological and statistical quality                                |                                        | High                              |
|                              | Indirectness                                                          |                                        | No                                |
|                              | Publication bias                                                      |                                        | No                                |
|                              | Inconsistency with other trials                                       |                                        | Not assessable                    |
| Up-grading                   | Size of effect                                                        |                                        | Not relevant                      |
|                              | Residual confounding                                                  |                                        | Not assessable                    |
|                              | Dose /response                                                        |                                        | Not relevant                      |
| DETAILS                      |                                                                       |                                        |                                   |
| Downgrading                  |                                                                       |                                        |                                   |
| Up-grading                   |                                                                       |                                        |                                   |
| <b>Conclusive evaluation</b> | GRADE rating up/down                                                  |                                        | No grading modification           |
|                              | GRADE rating                                                          |                                        | High evidence                     |
|                              | Statistical reporting                                                 |                                        | Sufficient for quality assessment |
|                              | Methodological and statistical quality                                |                                        | High                              |
|                              | External validity issues                                              |                                        | No                                |
|                              | Final grading                                                         |                                        | No grading modification           |
| Final level of evidence      |                                                                       | High evidence                          |                                   |

**Figure S2** : Forest plots illustrating absolute and relative risks for the PROPPR trial. The 24-hour and 30-day mortality outcomes are reported

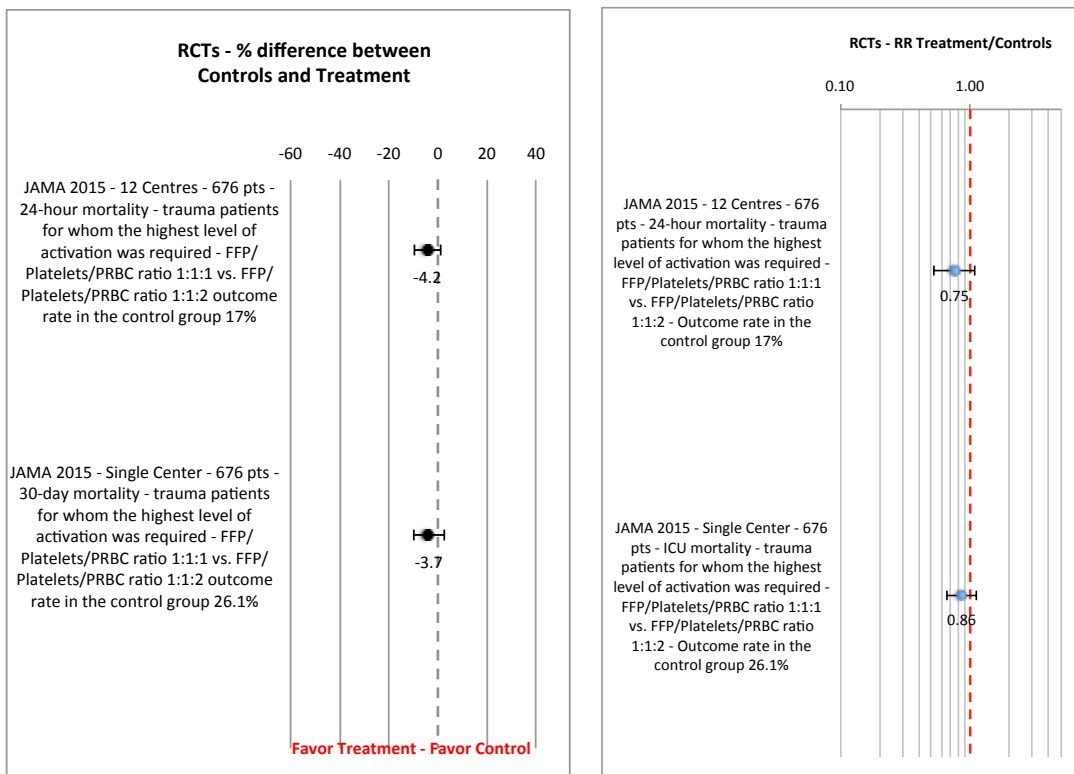

Supplement: pone.0164090.s002.pdf [file pone.0164090.s002.pdf]
