# Supplementary material for: Blood Component Therapy and Coagulopathy in Trauma: A Systematic Review of the Literature from the Trauma Update Group
Source: PubMed Central journal article supplement (PMC5047588; doi:10.1371/journal.pone.0164090), 2016-10-03
Supplement: pone.0164090.s001.pdf [file pone.0164090.s001.pdf]

**S1-file:** MEDLINE database search, flow diagram illustrating the literature selection process, and evidence assessment for the first query.

**Query # 1:** *“Does coagulopathy affect mortality in trauma?”*.

**PubMed search details:** search date December 9 2014

```
((("blood coagulation disorders"[MeSH Terms] OR ("blood"[All Fields] AND "coagulation"[All Fields] AND "disorders"[All Fields]) OR "blood coagulation disorders"[All Fields] OR "coagulopathy"[All Fields]) AND ("injuries"[Subheading] OR "injuries"[All Fields] OR "trauma"[All Fields] OR "wounds and injuries"[MeSH Terms] OR ("wounds"[All Fields] AND "injuries"[All Fields]) OR "wounds and injuries"[All Fields])) AND ("mortality"[Subheading] OR "mortality"[All Fields] OR "mortality"[MeSH Terms])) AND ("2000/01/01"[PDAT]: "3000"[PDAT])
```

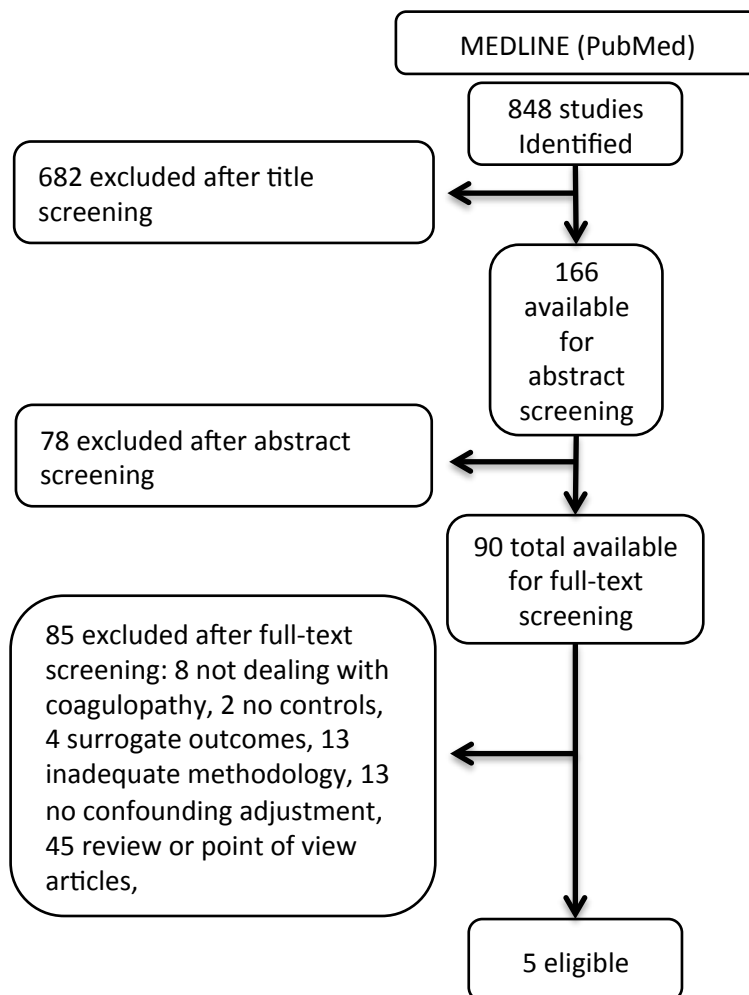

**Table S1**

|                                      |                                                                                                                                              |                                                                                                                                                                                                         |
|--------------------------------------|----------------------------------------------------------------------------------------------------------------------------------------------|---------------------------------------------------------------------------------------------------------------------------------------------------------------------------------------------------------|
| Observational study                  | 1                                                                                                                                            | Very low evidence - Downgraded study                                                                                                                                                                    |
| <b>Year</b>                          | 2014                                                                                                                                         |                                                                                                                                                                                                         |
| <b>Journal</b>                       | CC                                                                                                                                           |                                                                                                                                                                                                         |
| <b>First Author</b>                  | Hagemo                                                                                                                                       |                                                                                                                                                                                                         |
| <b>Statistical method</b>            | Generalised additive regression and piecewise linear model                                                                                   |                                                                                                                                                                                                         |
| <b>Inclusion criteria</b>            | Patients initiating full trauma team response with time from injury to arrival within 180 minutes                                            |                                                                                                                                                                                                         |
| <b>Risk factor</b>                   | Fibrinogen and platelet reduction, INR increase                                                                                              |                                                                                                                                                                                                         |
| <b>Centres</b>                       | 4                                                                                                                                            | <b>Outcome</b><br>28-day mortality: NA<br><b>Variable: OR (95%-CI)</b><br>Low fibrinogen: 0.08 (0.03-0.20)<br>High fibrinogen: 1.77 (0.94-3.32)<br>INR: 1.65 (0.65-4.18)<br>Platelet count: 1 (1.0-1.0) |
| <b>N° patients/centre/year</b>       | NA                                                                                                                                           |                                                                                                                                                                                                         |
| <b>Study duration (days)</b>         | 729                                                                                                                                          |                                                                                                                                                                                                         |
| <b>Total (included in the model)</b> | 1133                                                                                                                                         |                                                                                                                                                                                                         |
| <b>GRADE CRITERIA</b>                |                                                                                                                                              |                                                                                                                                                                                                         |
|                                      | <b>Statistical reporting</b>                                                                                                                 | Partial                                                                                                                                                                                                 |
|                                      | <b>Methodological and statistical quality</b>                                                                                                | Low                                                                                                                                                                                                     |
| <b>Downgrading</b>                   | Appropriate eligibility criteria                                                                                                             | Yes                                                                                                                                                                                                     |
|                                      | Measurement of exposure                                                                                                                      | Yes                                                                                                                                                                                                     |
|                                      | Measurement of outcome                                                                                                                       | Yes                                                                                                                                                                                                     |
|                                      | Adequate control for confounding<br>Bias                                                                                                     | No<br>very serious                                                                                                                                                                                      |
| <b>Up-grading</b>                    | Size of effect                                                                                                                               | Very large                                                                                                                                                                                              |
|                                      | Residual confounding                                                                                                                         | Does not indicate upgrading                                                                                                                                                                             |
|                                      | Dose /response                                                                                                                               | Yes                                                                                                                                                                                                     |
| <b>DETAILS</b>                       |                                                                                                                                              |                                                                                                                                                                                                         |
| <b>Downgrading</b>                   |                                                                                                                                              |                                                                                                                                                                                                         |
| <b>Up-grading</b>                    | Dose /response: FFP:PRBC ratio significant as a continuous variable generated, however, by a probably biased model. Upgrading not indicated. |                                                                                                                                                                                                         |
| <b>External validity</b>             | Only two centres participating to the study, with, however, a high number of patients treated per centre                                     |                                                                                                                                                                                                         |
| <b>Conclusive evaluation</b>         | GRADE rating up/down                                                                                                                         | Downgraded study                                                                                                                                                                                        |
|                                      | GRADE rating                                                                                                                                 | Very low evidence                                                                                                                                                                                       |
|                                      | Statistical reporting                                                                                                                        | Partial                                                                                                                                                                                                 |
|                                      | Methodological and statistical quality                                                                                                       | Low                                                                                                                                                                                                     |
|                                      | External validity issues                                                                                                                     | Yes                                                                                                                                                                                                     |
|                                      | Final grading                                                                                                                                | Downgraded study                                                                                                                                                                                        |
|                                      | Final level of evidence                                                                                                                      | Very low evidence                                                                                                                                                                                       |

**Table S1** (continued from the previous page)

|                                      |                                                                                                                                                                                                                                                                                                                                                                                                                                                                                                                                                                                                                                                                                                              |                                                              |
|--------------------------------------|--------------------------------------------------------------------------------------------------------------------------------------------------------------------------------------------------------------------------------------------------------------------------------------------------------------------------------------------------------------------------------------------------------------------------------------------------------------------------------------------------------------------------------------------------------------------------------------------------------------------------------------------------------------------------------------------------------------|--------------------------------------------------------------|
| Observational study                  | 2                                                                                                                                                                                                                                                                                                                                                                                                                                                                                                                                                                                                                                                                                                            | Very low evidence - Downgraded study                         |
| <b>Year</b>                          | 2012                                                                                                                                                                                                                                                                                                                                                                                                                                                                                                                                                                                                                                                                                                         |                                                              |
| <b>Journal</b>                       | JTH                                                                                                                                                                                                                                                                                                                                                                                                                                                                                                                                                                                                                                                                                                          |                                                              |
| <b>First Author</b>                  | Rourke                                                                                                                                                                                                                                                                                                                                                                                                                                                                                                                                                                                                                                                                                                       |                                                              |
| <b>Statistical method</b>            | Logistic regression                                                                                                                                                                                                                                                                                                                                                                                                                                                                                                                                                                                                                                                                                          |                                                              |
| <b>Inclusion criteria</b>            | Time from injury to arrival within 120 minutes, SBP < 90 at admission, poor responsiveness to initial fluid administration                                                                                                                                                                                                                                                                                                                                                                                                                                                                                                                                                                                   |                                                              |
| <b>Risk factor</b>                   | Fibrinogen reduction, APTT increase                                                                                                                                                                                                                                                                                                                                                                                                                                                                                                                                                                                                                                                                          |                                                              |
| <b>Centres</b>                       | 2                                                                                                                                                                                                                                                                                                                                                                                                                                                                                                                                                                                                                                                                                                            | <b>Outcome</b><br>28-day mortality: 62 (12%)                 |
| <b>N° patients/centre/year</b>       | 86                                                                                                                                                                                                                                                                                                                                                                                                                                                                                                                                                                                                                                                                                                           | <b>Variable: OR (95%-CI)</b><br>Fibrinogen: 0.22 (0.10-0.47) |
| <b>Study duration (days)</b>         | 1095                                                                                                                                                                                                                                                                                                                                                                                                                                                                                                                                                                                                                                                                                                         | APTT: 1.05 (1.01-1.09)                                       |
| <b>Total (included in the model)</b> | 517                                                                                                                                                                                                                                                                                                                                                                                                                                                                                                                                                                                                                                                                                                          |                                                              |
| <b>28-day mortality</b>              | 62 (12%)                                                                                                                                                                                                                                                                                                                                                                                                                                                                                                                                                                                                                                                                                                     |                                                              |
| <b>GRADE CRITERIA</b>                |                                                                                                                                                                                                                                                                                                                                                                                                                                                                                                                                                                                                                                                                                                              |                                                              |
|                                      | <b>Statistical reporting</b>                                                                                                                                                                                                                                                                                                                                                                                                                                                                                                                                                                                                                                                                                 | Partial                                                      |
|                                      | <b>Statistical quality</b>                                                                                                                                                                                                                                                                                                                                                                                                                                                                                                                                                                                                                                                                                   | Low                                                          |
| <b>Downgrading</b>                   | Appropriate eligibility criteria                                                                                                                                                                                                                                                                                                                                                                                                                                                                                                                                                                                                                                                                             | Yes                                                          |
|                                      | Measurement of exposure                                                                                                                                                                                                                                                                                                                                                                                                                                                                                                                                                                                                                                                                                      | Yes                                                          |
|                                      | Measurement of outcome                                                                                                                                                                                                                                                                                                                                                                                                                                                                                                                                                                                                                                                                                       | Yes                                                          |
|                                      | Adequate control for confounding                                                                                                                                                                                                                                                                                                                                                                                                                                                                                                                                                                                                                                                                             | No                                                           |
|                                      | Bias                                                                                                                                                                                                                                                                                                                                                                                                                                                                                                                                                                                                                                                                                                         | very serious                                                 |
| <b>Up-grading</b>                    | Size of effect                                                                                                                                                                                                                                                                                                                                                                                                                                                                                                                                                                                                                                                                                               | Large                                                        |
|                                      | Residual confounding                                                                                                                                                                                                                                                                                                                                                                                                                                                                                                                                                                                                                                                                                         | Does not indicate upgrading                                  |
|                                      | Dose /response                                                                                                                                                                                                                                                                                                                                                                                                                                                                                                                                                                                                                                                                                               | Not applicable                                               |
| <b>DETAILS</b>                       |                                                                                                                                                                                                                                                                                                                                                                                                                                                                                                                                                                                                                                                                                                              |                                                              |
| <b>Downgrading</b>                   | Adequate control for confounding: Only four variables entered the final model, too few for explanatory purposes. Statistical reporting : Logistic regression. No Statistical support reported. Checking for conformity with linear gradient for continuous variables not reported. Test for interaction not reported. Goodness-of-fit assessment not reported. Collinearity assessment not reported. Statistical tests for models not reported. Variable selection method: Stepwise forward selection. Reporting of variable coding method not performed. Methodological and statistical quality: Insufficient statistical reporting. Important covariates are missing in the model (possible underfitting). |                                                              |
|                                      |                                                                                                                                                                                                                                                                                                                                                                                                                                                                                                                                                                                                                                                                                                              |                                                              |
| <b>Up-grading</b>                    | Size of effect: The large fibrinogen OR reduction may be the result of a biased model. Upgrading is not indicated.                                                                                                                                                                                                                                                                                                                                                                                                                                                                                                                                                                                           |                                                              |
| <b>External validity</b>             | Only four centres participating to the study, with, however, a high number of patients treated per centre                                                                                                                                                                                                                                                                                                                                                                                                                                                                                                                                                                                                    |                                                              |
| <b>Conclusive evaluation</b>         | GRADE rating up/down                                                                                                                                                                                                                                                                                                                                                                                                                                                                                                                                                                                                                                                                                         | Downgraded study                                             |
|                                      | GRADE rating                                                                                                                                                                                                                                                                                                                                                                                                                                                                                                                                                                                                                                                                                                 | Very low evidence                                            |
|                                      | Statistical reporting                                                                                                                                                                                                                                                                                                                                                                                                                                                                                                                                                                                                                                                                                        | Partial                                                      |
|                                      | Methodological and statistical quality                                                                                                                                                                                                                                                                                                                                                                                                                                                                                                                                                                                                                                                                       | Low                                                          |
|                                      | External validity issues                                                                                                                                                                                                                                                                                                                                                                                                                                                                                                                                                                                                                                                                                     | Yes                                                          |
|                                      | Final grading                                                                                                                                                                                                                                                                                                                                                                                                                                                                                                                                                                                                                                                                                                | Downgraded study                                             |
|                                      | Final level of evidence                                                                                                                                                                                                                                                                                                                                                                                                                                                                                                                                                                                                                                                                                      | Very low evidence                                            |

**Table S1** (continued from the previous page)

|                                      |                                                                                                                                                                                                                                                                                                                                                                                                                                                                                                                                                                                             |                                                                  |
|--------------------------------------|---------------------------------------------------------------------------------------------------------------------------------------------------------------------------------------------------------------------------------------------------------------------------------------------------------------------------------------------------------------------------------------------------------------------------------------------------------------------------------------------------------------------------------------------------------------------------------------------|------------------------------------------------------------------|
| Observational                        | 3                                                                                                                                                                                                                                                                                                                                                                                                                                                                                                                                                                                           | Very low evidence - Downgraded study                             |
| <b>Year</b>                          | 2010                                                                                                                                                                                                                                                                                                                                                                                                                                                                                                                                                                                        |                                                                  |
| <b>Journal</b>                       | Injury                                                                                                                                                                                                                                                                                                                                                                                                                                                                                                                                                                                      |                                                                  |
| <b>First Author</b>                  | Mitra                                                                                                                                                                                                                                                                                                                                                                                                                                                                                                                                                                                       |                                                                  |
| <b>Statistical method</b>            | Logistic regression                                                                                                                                                                                                                                                                                                                                                                                                                                                                                                                                                                         |                                                                  |
| <b>Inclusion criteria</b>            | Patients receiving more than 4 packed red blood cell units within 4 hours from admission                                                                                                                                                                                                                                                                                                                                                                                                                                                                                                    |                                                                  |
| <b>Risk factor</b>                   | INR increase, Platelet count reduction                                                                                                                                                                                                                                                                                                                                                                                                                                                                                                                                                      |                                                                  |
| <b>Centres</b>                       | 1                                                                                                                                                                                                                                                                                                                                                                                                                                                                                                                                                                                           | <b>Outcome</b><br>30-day mortality: 99 (29.9%)                   |
| <b>N° patients/centre/year</b>       | 90                                                                                                                                                                                                                                                                                                                                                                                                                                                                                                                                                                                          | <b>Variable: OR (95%-CI)</b><br>Platelet count: 0.99 (0.99-0.99) |
| <b>Study duration (days)</b>         | 1338                                                                                                                                                                                                                                                                                                                                                                                                                                                                                                                                                                                        | INR: 1.43 (1.02-2.01)                                            |
| <b>Total (included in the model)</b> | 331                                                                                                                                                                                                                                                                                                                                                                                                                                                                                                                                                                                         |                                                                  |
| <b>GRADE CRITERIA</b>                |                                                                                                                                                                                                                                                                                                                                                                                                                                                                                                                                                                                             |                                                                  |
|                                      | <b>Statistical reporting</b>                                                                                                                                                                                                                                                                                                                                                                                                                                                                                                                                                                | Partial                                                          |
|                                      | <b>Statistical quality</b>                                                                                                                                                                                                                                                                                                                                                                                                                                                                                                                                                                  | Low                                                              |
| <b>Downgrading</b>                   | Appropriate eligibility criteria                                                                                                                                                                                                                                                                                                                                                                                                                                                                                                                                                            | Yes                                                              |
|                                      | Measurement of exposure                                                                                                                                                                                                                                                                                                                                                                                                                                                                                                                                                                     | Yes                                                              |
|                                      | Measurement of outcome                                                                                                                                                                                                                                                                                                                                                                                                                                                                                                                                                                      | Yes                                                              |
|                                      | Adequate control for confounding                                                                                                                                                                                                                                                                                                                                                                                                                                                                                                                                                            | No                                                               |
|                                      | Bias                                                                                                                                                                                                                                                                                                                                                                                                                                                                                                                                                                                        | very serious                                                     |
| <b>Up-grading</b>                    | Size of effect                                                                                                                                                                                                                                                                                                                                                                                                                                                                                                                                                                              | Very large                                                       |
|                                      | Residual confounding                                                                                                                                                                                                                                                                                                                                                                                                                                                                                                                                                                        | Does not indicate upgrading                                      |
|                                      | Dose /response                                                                                                                                                                                                                                                                                                                                                                                                                                                                                                                                                                              | Yes                                                              |
| <b>DETAILS</b>                       |                                                                                                                                                                                                                                                                                                                                                                                                                                                                                                                                                                                             |                                                                  |
| <b>Downgrading</b>                   | Adequate control for confounding: Only 3 variables remained in the model an insufficient number for explanatory purposes. Statistical reporting: Logistic regression. Checking for conformity with linear gradient for continuous variables not reported. Test for interaction not reported. Goodness-of-fit assessment not reported. Collinearity assessment not reported. Statistical tests for models not reported. Variable selection method: Stepwise backward elimination. Reporting of variable coding method not indicated. Statistical quality: Possibly underfitted of the model. |                                                                  |
| <b>Up-grading</b>                    | Size of effect: The 43% mortality risk with each unitary INR increase was generated by a potentially biased model. Upgrading not indicated.                                                                                                                                                                                                                                                                                                                                                                                                                                                 |                                                                  |
| <b>External validity</b>             | Single centre study                                                                                                                                                                                                                                                                                                                                                                                                                                                                                                                                                                         |                                                                  |
| <b>Conclusive evaluation</b>         | GRADE rating up/down                                                                                                                                                                                                                                                                                                                                                                                                                                                                                                                                                                        | Downgraded study                                                 |
|                                      | GRADE rating                                                                                                                                                                                                                                                                                                                                                                                                                                                                                                                                                                                | Very low evidence                                                |
|                                      | Statistical reporting                                                                                                                                                                                                                                                                                                                                                                                                                                                                                                                                                                       | Partial                                                          |
|                                      | Statistical quality                                                                                                                                                                                                                                                                                                                                                                                                                                                                                                                                                                         | Low                                                              |
|                                      | External validity issues                                                                                                                                                                                                                                                                                                                                                                                                                                                                                                                                                                    | Yes                                                              |
|                                      | Final grading                                                                                                                                                                                                                                                                                                                                                                                                                                                                                                                                                                               | Downgraded study                                                 |
| Final level of evidence              | Very low evidence                                                                                                                                                                                                                                                                                                                                                                                                                                                                                                                                                                           |                                                                  |

**Table S1** (continued from the previous page)

|                               |                                                                                                                                                                                                                                                                                                                                                                                                                                                                                                                                                                                                                                                                                                                                                                                                                                                                                                                                                                                                  |                                                                          |
|-------------------------------|--------------------------------------------------------------------------------------------------------------------------------------------------------------------------------------------------------------------------------------------------------------------------------------------------------------------------------------------------------------------------------------------------------------------------------------------------------------------------------------------------------------------------------------------------------------------------------------------------------------------------------------------------------------------------------------------------------------------------------------------------------------------------------------------------------------------------------------------------------------------------------------------------------------------------------------------------------------------------------------------------|--------------------------------------------------------------------------|
| Observational study           | 4                                                                                                                                                                                                                                                                                                                                                                                                                                                                                                                                                                                                                                                                                                                                                                                                                                                                                                                                                                                                | Very low evidence - Downgraded study                                     |
| Year                          | 2003                                                                                                                                                                                                                                                                                                                                                                                                                                                                                                                                                                                                                                                                                                                                                                                                                                                                                                                                                                                             |                                                                          |
| Journal                       | JT                                                                                                                                                                                                                                                                                                                                                                                                                                                                                                                                                                                                                                                                                                                                                                                                                                                                                                                                                                                               |                                                                          |
| First Author                  | MacLeod                                                                                                                                                                                                                                                                                                                                                                                                                                                                                                                                                                                                                                                                                                                                                                                                                                                                                                                                                                                          |                                                                          |
| Statistical method            | Logistic regression                                                                                                                                                                                                                                                                                                                                                                                                                                                                                                                                                                                                                                                                                                                                                                                                                                                                                                                                                                              |                                                                          |
| Inclusion criteria            | All patients with trauma                                                                                                                                                                                                                                                                                                                                                                                                                                                                                                                                                                                                                                                                                                                                                                                                                                                                                                                                                                         |                                                                          |
| Risk factor                   | PT and APTT increase                                                                                                                                                                                                                                                                                                                                                                                                                                                                                                                                                                                                                                                                                                                                                                                                                                                                                                                                                                             |                                                                          |
| Centres                       | 1                                                                                                                                                                                                                                                                                                                                                                                                                                                                                                                                                                                                                                                                                                                                                                                                                                                                                                                                                                                                | <b>Outcome</b><br>Hospital mortality: NA<br><b>Variable: OR (95%-CI)</b> |
| N° patients/centre/year       | 1272                                                                                                                                                                                                                                                                                                                                                                                                                                                                                                                                                                                                                                                                                                                                                                                                                                                                                                                                                                                             | PT: 1.35 (1.11-1.68)                                                     |
| Study duration (days)         | 2191                                                                                                                                                                                                                                                                                                                                                                                                                                                                                                                                                                                                                                                                                                                                                                                                                                                                                                                                                                                             | APTT: 4.26 (3.23-5.62)                                                   |
| Total (included in the model) | 7638                                                                                                                                                                                                                                                                                                                                                                                                                                                                                                                                                                                                                                                                                                                                                                                                                                                                                                                                                                                             |                                                                          |
| <b>GRADE CRITERIA</b>         |                                                                                                                                                                                                                                                                                                                                                                                                                                                                                                                                                                                                                                                                                                                                                                                                                                                                                                                                                                                                  |                                                                          |
|                               | <b>Statistical reporting</b>                                                                                                                                                                                                                                                                                                                                                                                                                                                                                                                                                                                                                                                                                                                                                                                                                                                                                                                                                                     | Partial                                                                  |
|                               | <b>Statistical quality</b>                                                                                                                                                                                                                                                                                                                                                                                                                                                                                                                                                                                                                                                                                                                                                                                                                                                                                                                                                                       | Low                                                                      |
| <b>Downgrading</b>            | GRADE overall                                                                                                                                                                                                                                                                                                                                                                                                                                                                                                                                                                                                                                                                                                                                                                                                                                                                                                                                                                                    | Yes                                                                      |
|                               | Indirectness                                                                                                                                                                                                                                                                                                                                                                                                                                                                                                                                                                                                                                                                                                                                                                                                                                                                                                                                                                                     | Yes                                                                      |
|                               | Imprecision                                                                                                                                                                                                                                                                                                                                                                                                                                                                                                                                                                                                                                                                                                                                                                                                                                                                                                                                                                                      | Yes                                                                      |
|                               | Other                                                                                                                                                                                                                                                                                                                                                                                                                                                                                                                                                                                                                                                                                                                                                                                                                                                                                                                                                                                            | No                                                                       |
|                               | Publication bias                                                                                                                                                                                                                                                                                                                                                                                                                                                                                                                                                                                                                                                                                                                                                                                                                                                                                                                                                                                 | very serious                                                             |
| <b>Up-grading</b>             | Size of effect                                                                                                                                                                                                                                                                                                                                                                                                                                                                                                                                                                                                                                                                                                                                                                                                                                                                                                                                                                                   | Large                                                                    |
|                               | Residual confounding                                                                                                                                                                                                                                                                                                                                                                                                                                                                                                                                                                                                                                                                                                                                                                                                                                                                                                                                                                             | Does not indicate upgrading                                              |
|                               | Dose /response                                                                                                                                                                                                                                                                                                                                                                                                                                                                                                                                                                                                                                                                                                                                                                                                                                                                                                                                                                                   | Yes                                                                      |
| <b>DETAILS</b>                |                                                                                                                                                                                                                                                                                                                                                                                                                                                                                                                                                                                                                                                                                                                                                                                                                                                                                                                                                                                                  |                                                                          |
| <b>Downgrading</b>            | Adequate control for confounding: Insufficient number of variables for an explanatory model, variables were arbitrarily dichotomized. Statistical reporting: Logistic regression. No Statistical support reported. Checking for conformity with linear gradient for continuous variables not reported. Dichotomization of continuous variables. Test for interaction not reported. Goodness-of-fit assessment not reported. Collinearity assessment not reported. Statistical tests for models not reported. Variable selection method: Not Reported. Reporting of variable coding method not performed. Comments: Crude mortality rate of patients included in logistic regression not available. There were 1276 deaths out of 14397 patients in the overall cohort (8.9%). Statistical quality: Dichotomization of almost all continuous variables included in the model was not justified and thus was probably based on arbitrary cut-offs. The model did not include important predictors. |                                                                          |
|                               | Size of effect: Large effect for PTT, generated however by a potentially biased model. Dose /response: FFP:PRBC ratio significant as a continuous variable generated, however, by a probably biased model. Upgrading not indicated.                                                                                                                                                                                                                                                                                                                                                                                                                                                                                                                                                                                                                                                                                                                                                              |                                                                          |
| <b>External validity</b>      |                                                                                                                                                                                                                                                                                                                                                                                                                                                                                                                                                                                                                                                                                                                                                                                                                                                                                                                                                                                                  | Single centre study                                                      |
| <b>Conclusive evaluation</b>  | GRADE rating up/down                                                                                                                                                                                                                                                                                                                                                                                                                                                                                                                                                                                                                                                                                                                                                                                                                                                                                                                                                                             | Downgraded study                                                         |
|                               | GRADE rating                                                                                                                                                                                                                                                                                                                                                                                                                                                                                                                                                                                                                                                                                                                                                                                                                                                                                                                                                                                     | Very low evidence                                                        |
|                               | Statistical reporting                                                                                                                                                                                                                                                                                                                                                                                                                                                                                                                                                                                                                                                                                                                                                                                                                                                                                                                                                                            | Partial                                                                  |
|                               | Statistical quality                                                                                                                                                                                                                                                                                                                                                                                                                                                                                                                                                                                                                                                                                                                                                                                                                                                                                                                                                                              | Low                                                                      |
|                               | External validity issues                                                                                                                                                                                                                                                                                                                                                                                                                                                                                                                                                                                                                                                                                                                                                                                                                                                                                                                                                                         | No                                                                       |
|                               | Final grading                                                                                                                                                                                                                                                                                                                                                                                                                                                                                                                                                                                                                                                                                                                                                                                                                                                                                                                                                                                    | Downgraded study                                                         |
|                               | Final level of evidence                                                                                                                                                                                                                                                                                                                                                                                                                                                                                                                                                                                                                                                                                                                                                                                                                                                                                                                                                                          | Very low evidence                                                        |

**Table S1** (continued from the previous page)

|                                      |                                                                                                                                                                                                                                                                                                                                                                                                                                                                                                                                                                                                                                                                   |                                                                                                                |
|--------------------------------------|-------------------------------------------------------------------------------------------------------------------------------------------------------------------------------------------------------------------------------------------------------------------------------------------------------------------------------------------------------------------------------------------------------------------------------------------------------------------------------------------------------------------------------------------------------------------------------------------------------------------------------------------------------------------|----------------------------------------------------------------------------------------------------------------|
| Observational study                  | 5                                                                                                                                                                                                                                                                                                                                                                                                                                                                                                                                                                                                                                                                 | Very low evidence - Downgraded study                                                                           |
| <b>Year</b>                          | 2011                                                                                                                                                                                                                                                                                                                                                                                                                                                                                                                                                                                                                                                              |                                                                                                                |
| <b>Journal</b>                       | JT                                                                                                                                                                                                                                                                                                                                                                                                                                                                                                                                                                                                                                                                |                                                                                                                |
| <b>First Author</b>                  | Sambasivan                                                                                                                                                                                                                                                                                                                                                                                                                                                                                                                                                                                                                                                        |                                                                                                                |
| <b>Statistical method</b>            | Logistic regression                                                                                                                                                                                                                                                                                                                                                                                                                                                                                                                                                                                                                                               |                                                                                                                |
| <b>Inclusion criteria</b>            | Patients receiving at least one but less than 10 PRBC units within 24 hours from admission                                                                                                                                                                                                                                                                                                                                                                                                                                                                                                                                                                        |                                                                                                                |
| <b>Risk factor</b>                   | APTT increase                                                                                                                                                                                                                                                                                                                                                                                                                                                                                                                                                                                                                                                     |                                                                                                                |
| <b>Centres</b>                       | 23                                                                                                                                                                                                                                                                                                                                                                                                                                                                                                                                                                                                                                                                | <b>Outcome</b><br>Hospital mortality: 173 (14.6%)<br><b>Variable: OR (95%-CI)</b><br>APTT: 1.015 (1.010-1.019) |
| <b>N° patients/centre/year</b>       | 22                                                                                                                                                                                                                                                                                                                                                                                                                                                                                                                                                                                                                                                                |                                                                                                                |
| <b>Study duration (days)</b>         | 851                                                                                                                                                                                                                                                                                                                                                                                                                                                                                                                                                                                                                                                               |                                                                                                                |
| <b>Total (included in the model)</b> | 1181                                                                                                                                                                                                                                                                                                                                                                                                                                                                                                                                                                                                                                                              |                                                                                                                |
| <b>GRADE CRITERIA</b>                |                                                                                                                                                                                                                                                                                                                                                                                                                                                                                                                                                                                                                                                                   |                                                                                                                |
|                                      | <b>Statistical reporting</b>                                                                                                                                                                                                                                                                                                                                                                                                                                                                                                                                                                                                                                      | Partial                                                                                                        |
|                                      | <b>Statistical quality</b>                                                                                                                                                                                                                                                                                                                                                                                                                                                                                                                                                                                                                                        | Low                                                                                                            |
| <b>Downgrading</b>                   | GRADE overall                                                                                                                                                                                                                                                                                                                                                                                                                                                                                                                                                                                                                                                     | Yes                                                                                                            |
|                                      | Indirectness                                                                                                                                                                                                                                                                                                                                                                                                                                                                                                                                                                                                                                                      | Yes                                                                                                            |
|                                      | Imprecision                                                                                                                                                                                                                                                                                                                                                                                                                                                                                                                                                                                                                                                       | Yes                                                                                                            |
|                                      | Other                                                                                                                                                                                                                                                                                                                                                                                                                                                                                                                                                                                                                                                             | No                                                                                                             |
|                                      | Publication bias                                                                                                                                                                                                                                                                                                                                                                                                                                                                                                                                                                                                                                                  | very serious                                                                                                   |
| <b>Up-grading</b>                    | Size of effect                                                                                                                                                                                                                                                                                                                                                                                                                                                                                                                                                                                                                                                    | Very large                                                                                                     |
|                                      | Residual confounding                                                                                                                                                                                                                                                                                                                                                                                                                                                                                                                                                                                                                                              | Does not indicate upgrading                                                                                    |
|                                      | Dose /response                                                                                                                                                                                                                                                                                                                                                                                                                                                                                                                                                                                                                                                    | Yes                                                                                                            |
| <b>DETAILS</b>                       |                                                                                                                                                                                                                                                                                                                                                                                                                                                                                                                                                                                                                                                                   |                                                                                                                |
| <b>Downgrading</b>                   | Adequate control for confounding: Only 4 variables remained in the model an insufficient number for explanatory purposes. Statistical reporting: Proportional hazards including propensity score. Checking for conformity with linear gradient for continuous variables not reported. Test for interaction not reported. Goodness-of-fit assessment not reported. Collinearity assessment not reported. Statistical tests for models not reported. Variable selection method: Stepwise forward selection. Reporting of variable coding method not indicated. Statistical quality: Hazard proportional assumption not checked. Possible underfitting of the model. |                                                                                                                |
| <b>Up-grading</b>                    | Size of effect: Very large protective effect generated, however, by a potentially biased model. No upgrading indicated. Dose /response: FFP:PRBC ratio significant as a continuous variable generated, however, by a probably biased model. Upgrading not indicated.                                                                                                                                                                                                                                                                                                                                                                                              |                                                                                                                |
| <b>External validity</b>             | Multicentre study, with sufficient number of patients per centre                                                                                                                                                                                                                                                                                                                                                                                                                                                                                                                                                                                                  |                                                                                                                |
| <b>Conclusive evaluation</b>         | GRADE rating up/down                                                                                                                                                                                                                                                                                                                                                                                                                                                                                                                                                                                                                                              | Downgraded study                                                                                               |
|                                      | GRADE rating                                                                                                                                                                                                                                                                                                                                                                                                                                                                                                                                                                                                                                                      | Very low evidence                                                                                              |
|                                      | Statistical reporting                                                                                                                                                                                                                                                                                                                                                                                                                                                                                                                                                                                                                                             | Partial                                                                                                        |
|                                      | Statistical quality                                                                                                                                                                                                                                                                                                                                                                                                                                                                                                                                                                                                                                               | Low                                                                                                            |
|                                      | External validity issues                                                                                                                                                                                                                                                                                                                                                                                                                                                                                                                                                                                                                                          | Yes                                                                                                            |
|                                      | Final grading                                                                                                                                                                                                                                                                                                                                                                                                                                                                                                                                                                                                                                                     | Downgraded study                                                                                               |
| Final level of evidence              | Very low evidence                                                                                                                                                                                                                                                                                                                                                                                                                                                                                                                                                                                                                                                 |                                                                                                                |
