# Supplementary material for: Blood Component Therapy and Coagulopathy in Trauma: A Systematic Review of the Literature from the Trauma Update Group
Source: PubMed Central journal article supplement (PMC5047588; doi:10.1371/journal.pone.0164090), 2016-10-03
Supplement: pone.0164090.s005.pdf [file pone.0164090.s005.pdf]

Suggestions for future observational studies:

|                            |                                                                                                                                                                                                                                                                                                                                                                                                                                                                                                                                                                                                                                                                                                                                                                                                                                                                                                                                                                                                                                                                                                                                                                                                                                                                                                                                                                                                           |
|----------------------------|-----------------------------------------------------------------------------------------------------------------------------------------------------------------------------------------------------------------------------------------------------------------------------------------------------------------------------------------------------------------------------------------------------------------------------------------------------------------------------------------------------------------------------------------------------------------------------------------------------------------------------------------------------------------------------------------------------------------------------------------------------------------------------------------------------------------------------------------------------------------------------------------------------------------------------------------------------------------------------------------------------------------------------------------------------------------------------------------------------------------------------------------------------------------------------------------------------------------------------------------------------------------------------------------------------------------------------------------------------------------------------------------------------------|
| Definitions                | <ol style="list-style-type: none"> <li>1) Do not define bleeding severity according to the number of PBRC units transfused in a specific timeframe. Definition should be based on parameters collected on admission</li> <li>2) Define coagulopathy</li> </ol>                                                                                                                                                                                                                                                                                                                                                                                                                                                                                                                                                                                                                                                                                                                                                                                                                                                                                                                                                                                                                                                                                                                                            |
| Case mix selection         | <ol style="list-style-type: none"> <li>1) Bleeding without coagulopathy</li> <li>2) Bleeding with coagulopathy</li> <li>3) Bleeding without coagulopathy and timely surgical/interventional haemostasis</li> <li>4) Bleeding with coagulopathy and delayed surgical/interventional haemostasis</li> <li>5) Terminal bleeding with consequent coagulopathy</li> </ol>                                                                                                                                                                                                                                                                                                                                                                                                                                                                                                                                                                                                                                                                                                                                                                                                                                                                                                                                                                                                                                      |
| Methodology and statistics | <ol style="list-style-type: none"> <li>1) Dataset: high quality database collecting items predefined to address specific queries</li> <li>2) Design: Availability of a control group (e.g. patients not receiving a specific treatment) for comparisons with the study group</li> <li>3) Statistics: control for confounding using appropriate statistical models methods (e.g. logistic regression, propensity score matching)</li> <li>4) Design and statistics: large cohorts should be analysed to avoid overfitting; at least 10 outcomes should be available for each variable included in the models (including the initial models before further variable selection)</li> <li>5) Dataset and statistics: the number of variables should be sufficient to develop <i>explanatory</i> models (i.e. most known important predictors should be included), avoid underfitting</li> <li>6) Statistics: avoid bivariate methods to select variables to be included in the model</li> <li>7) Statistics: be cautious in the use of automatic selection procedures for covariate selection, particularly when the sample size is not large</li> <li>8) Statistics: account for the immortal-time bias when dealing with time-dependent treatments</li> <li>9) Statistics: account for treatment selection bias (balance the probability of receiving treatment between study and control group)</li> </ol> |
| Treatment side effects     | Collect data concerning potential side effects (e.g. ALL after transfusion, deep venous or thrombosis after fibrinogen administration, etc.)                                                                                                                                                                                                                                                                                                                                                                                                                                                                                                                                                                                                                                                                                                                                                                                                                                                                                                                                                                                                                                                                                                                                                                                                                                                              |
| Outcome                    | Besides short-term outcomes (such as 6-24 hours, 28-days) middle-long term outcomes should be preferred (at least hospital outcomes; 6-months outcomes could be indicated in specific conditions: elderly, head trauma)                                                                                                                                                                                                                                                                                                                                                                                                                                                                                                                                                                                                                                                                                                                                                                                                                                                                                                                                                                                                                                                                                                                                                                                   |
| External validation        | Dataset: the number of patients and centres participating should be sufficiently large to allow the generalizability of the results                                                                                                                                                                                                                                                                                                                                                                                                                                                                                                                                                                                                                                                                                                                                                                                                                                                                                                                                                                                                                                                                                                                                                                                                                                                                       |
